# Supplementary material for: Synthesis and biological evaluation of dehydroabietic acid-pyrimidine hybrids as antitumor agents
Source: Royal Society of Chemistry journal article supplement (doi:10.1039/d0ra02432e), 2020-01-01
Supplement: d0ra02432e1.pdf [file d0ra02432e1.pdf]

## Supporting information

### Synthesis and biological evaluation of dehydroabietic acid-pyrimidine hybrids as antitumor agents

Lin Huang<sup>a</sup>, Rong Huang<sup>a</sup>, Fuhua Pang<sup>a</sup>, Anke Li<sup>a</sup>, Guobao Huang<sup>b</sup>, Xiaoqun

Zhou<sup>a\*</sup>, Qian Li<sup>a\*</sup>, Fangyao Li<sup>a,b,c\*</sup>, Xianli Ma<sup>a</sup>

<sup>a</sup> School of Pharmacy, Guilin Medical University, Guilin, Guangxi 541004, PR China

<sup>b</sup> Guangxi Key Lab of Agricultural Resources Chemistry and Biotechnology, College of Chemistry and Food Science, Yulin Normal University, Yulin, Guangxi 537000, PR China

<sup>c</sup> State Key Laboratory for Chemistry and Molecular Engineering of Medicinal Resources, Guangxi Normal University, Guilin, Guangxi 541006, PR China.

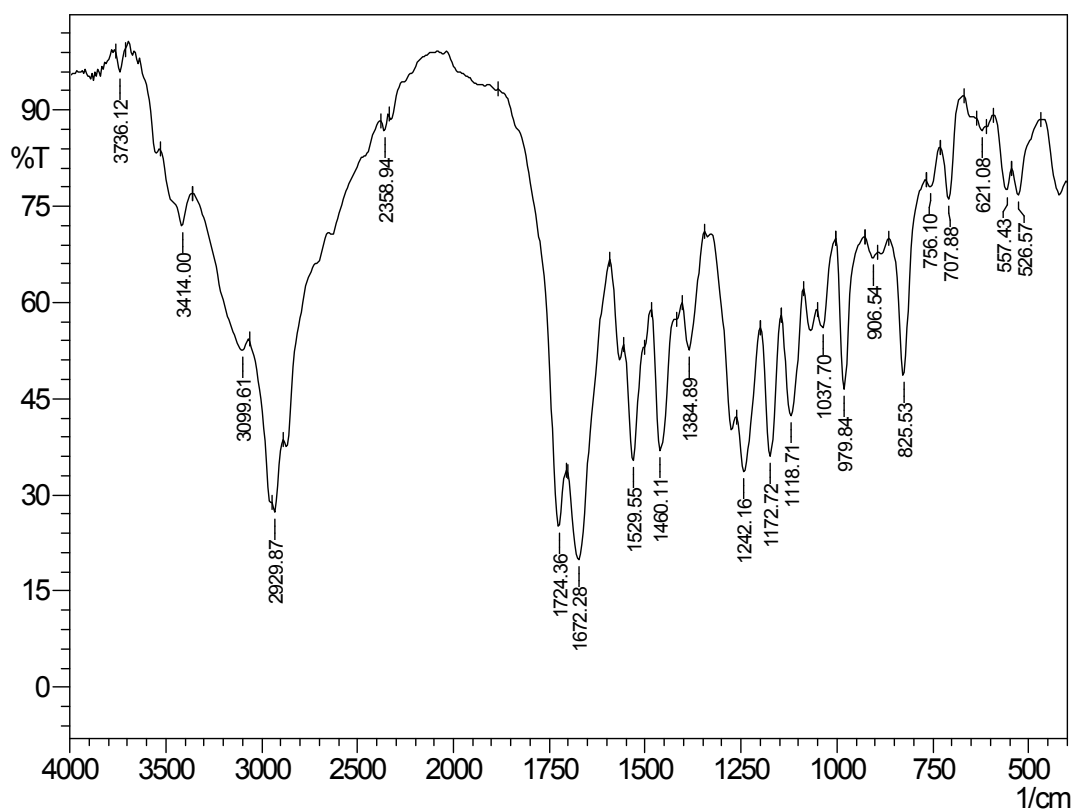

Figure S1. FTIR spectrum of the target compound (3a)

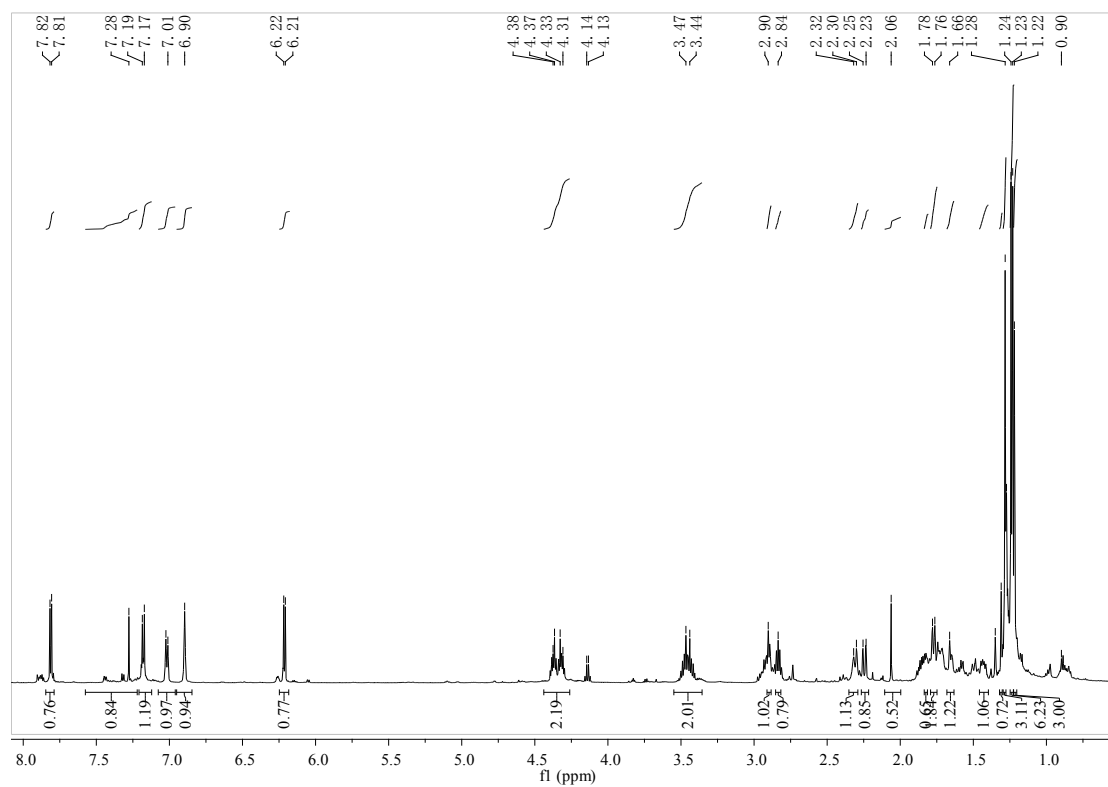

Figure S2.  $^1\text{H}$ -NMR spectrum of the target compound (**3a**) in  $\text{CDCl}_3$

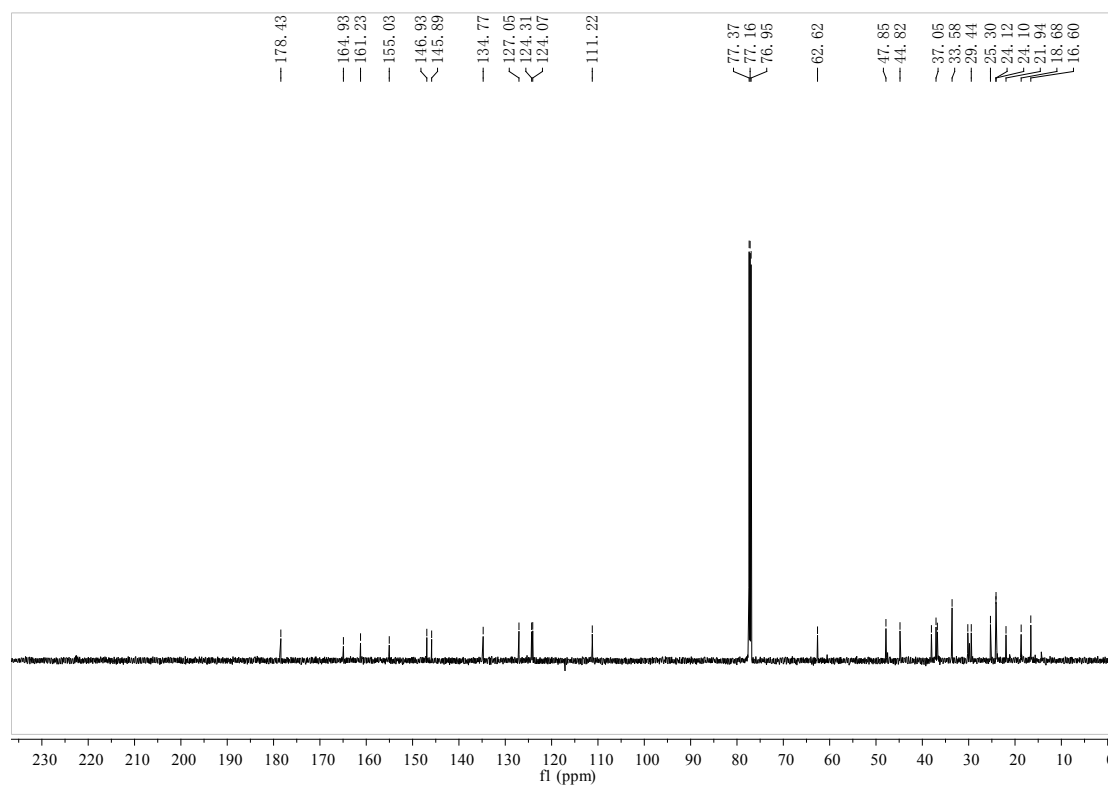

Figure S3.  $^{13}\text{C}$ -NMR spectrum of the target compound (**3a**) in  $\text{CDCl}_3$

|                    |                           |                               |         |                        |                      |
|--------------------|---------------------------|-------------------------------|---------|------------------------|----------------------|
| <b>Sample Name</b> | LFY01                     | <b>Position</b>               | P1-A1   | <b>Instrument Name</b> | Instrument 1         |
| <b>User Name</b>   |                           | <b>Inj Vol</b>                | 0.05    | <b>InjPosition</b>     |                      |
| <b>Sample Type</b> | Sample                    | <b>IRM Calibration Status</b> | Success | <b>Data Filename</b>   | LFY01.d              |
| <b>ACQ Method</b>  | yljing10-95% 8min Zheng.m | <b>Comment</b>                |         | <b>Acquired Time</b>   | 4/20/2020 3:06:01 PM |

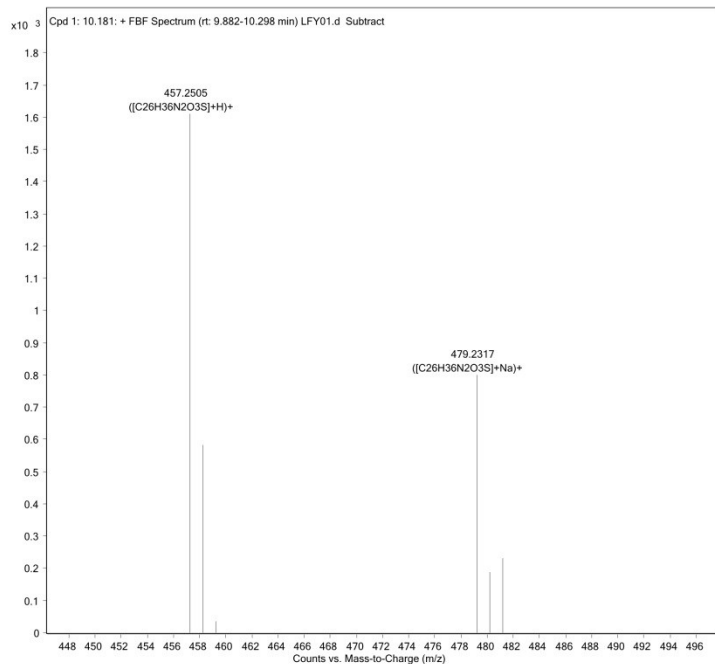

**Figure S4.** HR-MS spectrum of the target compound (**3a**)

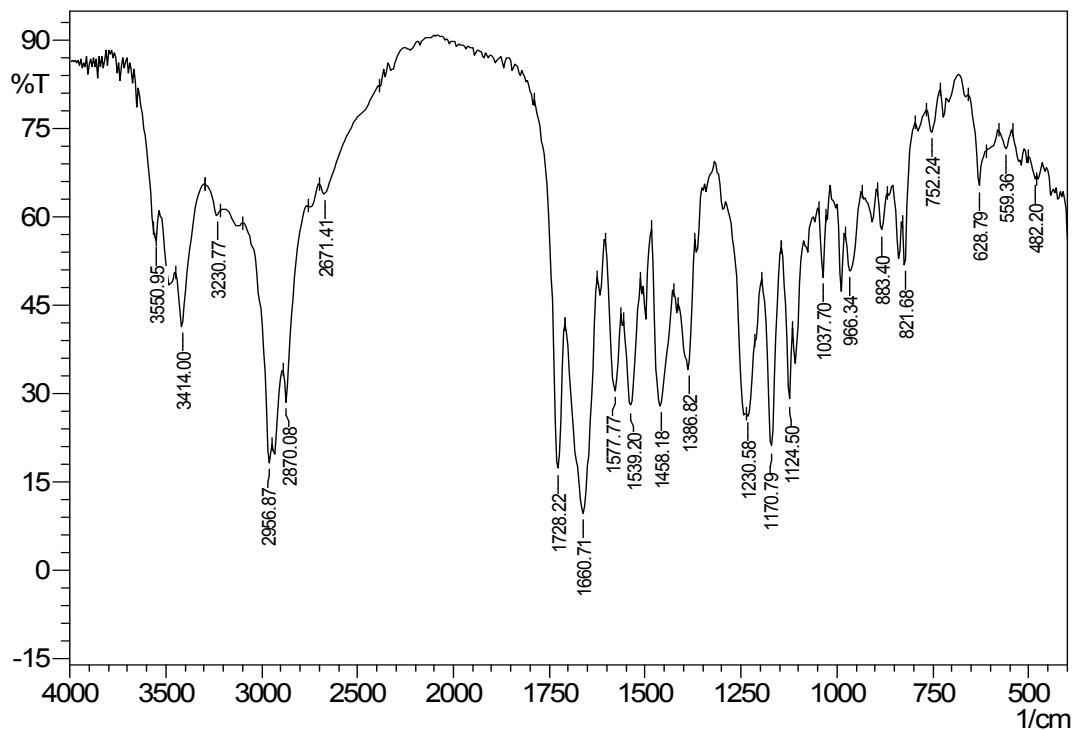

**Figure S5.** FTIR spectrum of the target compound (**3b**)

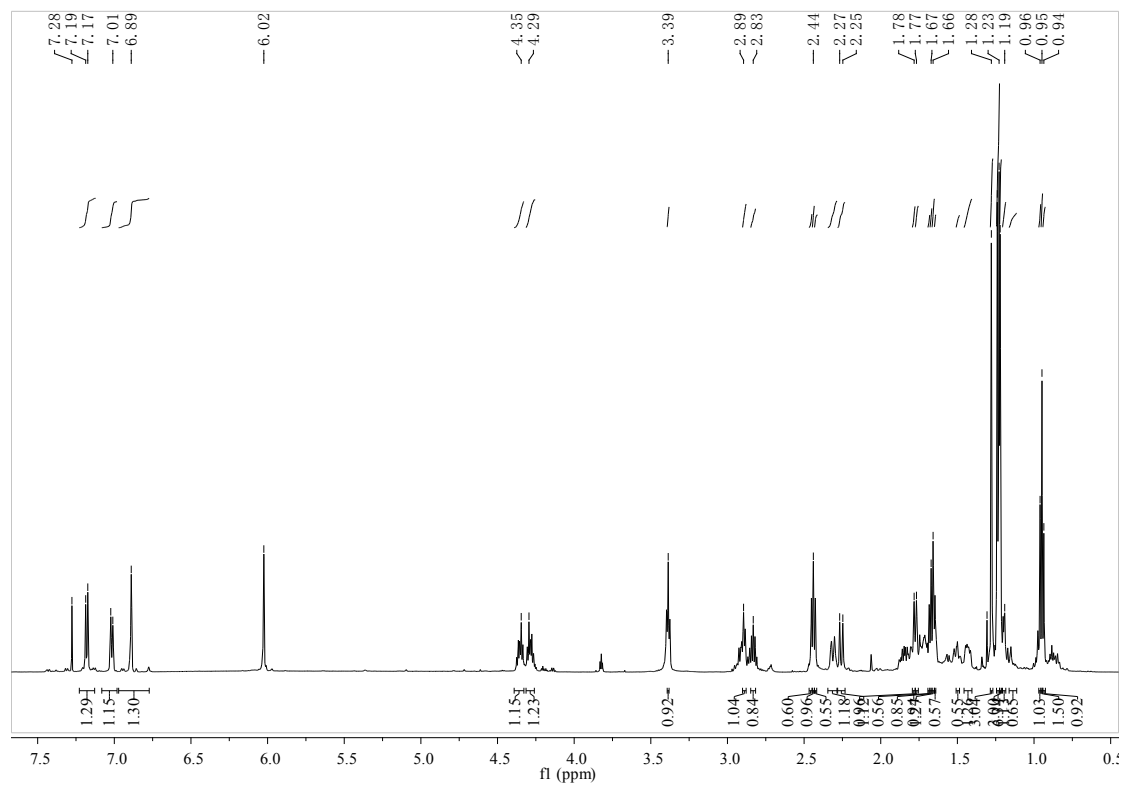

Figure S6.  $^1\text{H}$ -NMR spectrum of the target compound (**3b**) in  $\text{CDCl}_3$

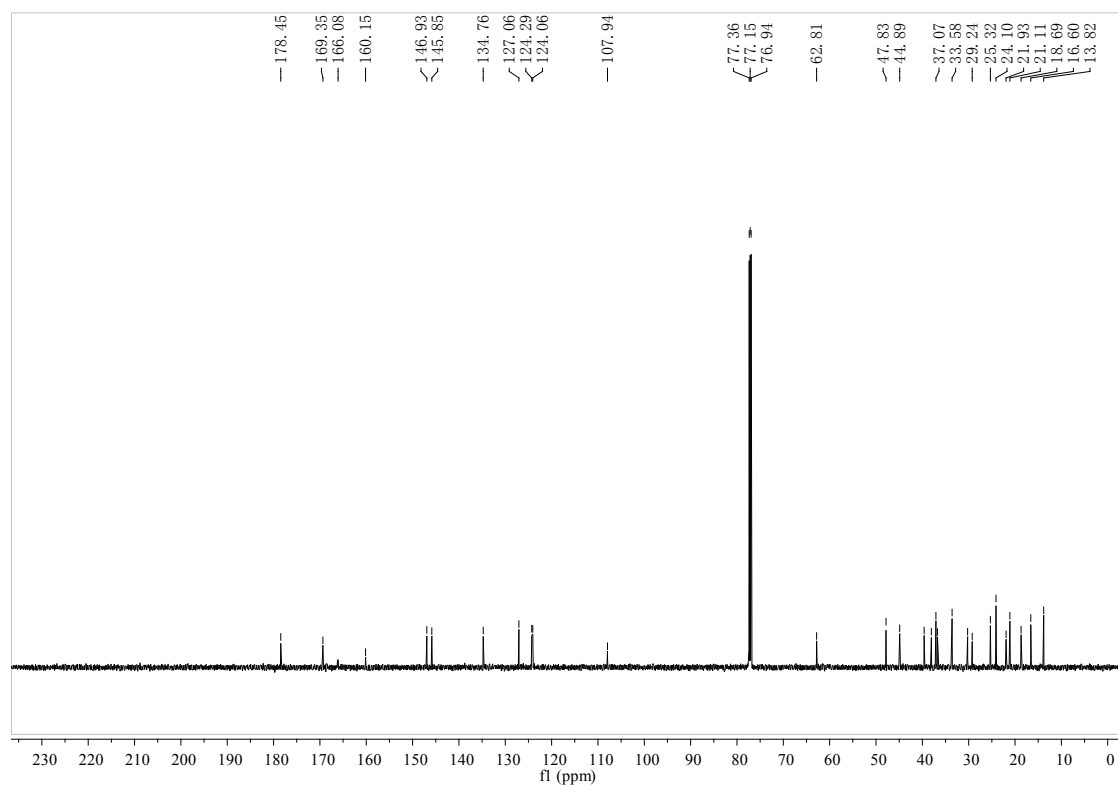

Figure S7.  $^{13}\text{C}$ -NMR spectrum of the target compound (**3b**) in  $\text{CDCl}_3$

|                    |                           |                               |         |                        |                      |
|--------------------|---------------------------|-------------------------------|---------|------------------------|----------------------|
| <b>Sample Name</b> | LFY02                     | <b>Position</b>               | P1-A2   | <b>Instrument Name</b> | Instrument 1         |
| <b>User Name</b>   |                           | <b>Inj Vol</b>                | 0.05    | <b>InjPosition</b>     |                      |
| <b>Sample Type</b> | Sample                    | <b>IRM Calibration Status</b> | Success | <b>Data Filename</b>   | LFY02.d              |
| <b>ACQ Method</b>  | yijing10-95% 8min Zheng.m | <b>Comment</b>                |         | <b>Acquired Time</b>   | 4/20/2020 3:20:44 PM |

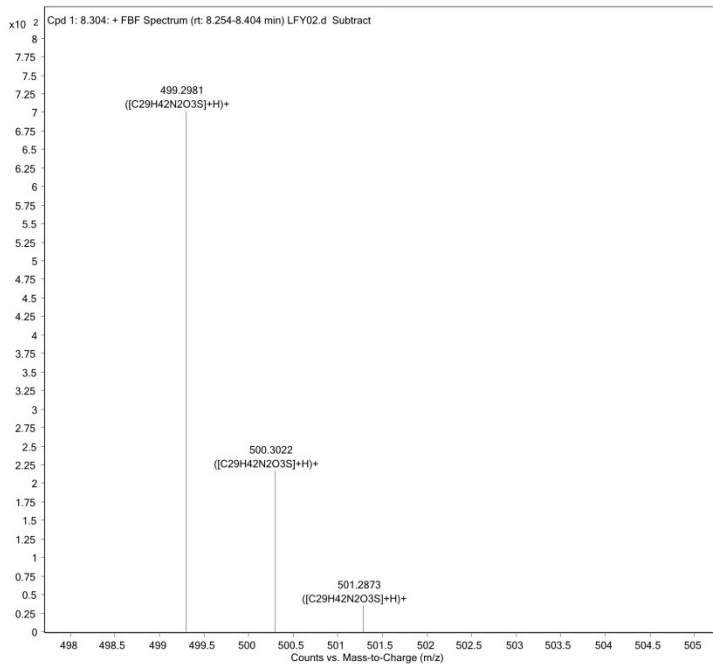

**Figure S8.** HR-MS spectrum of the target compound (**3b**)

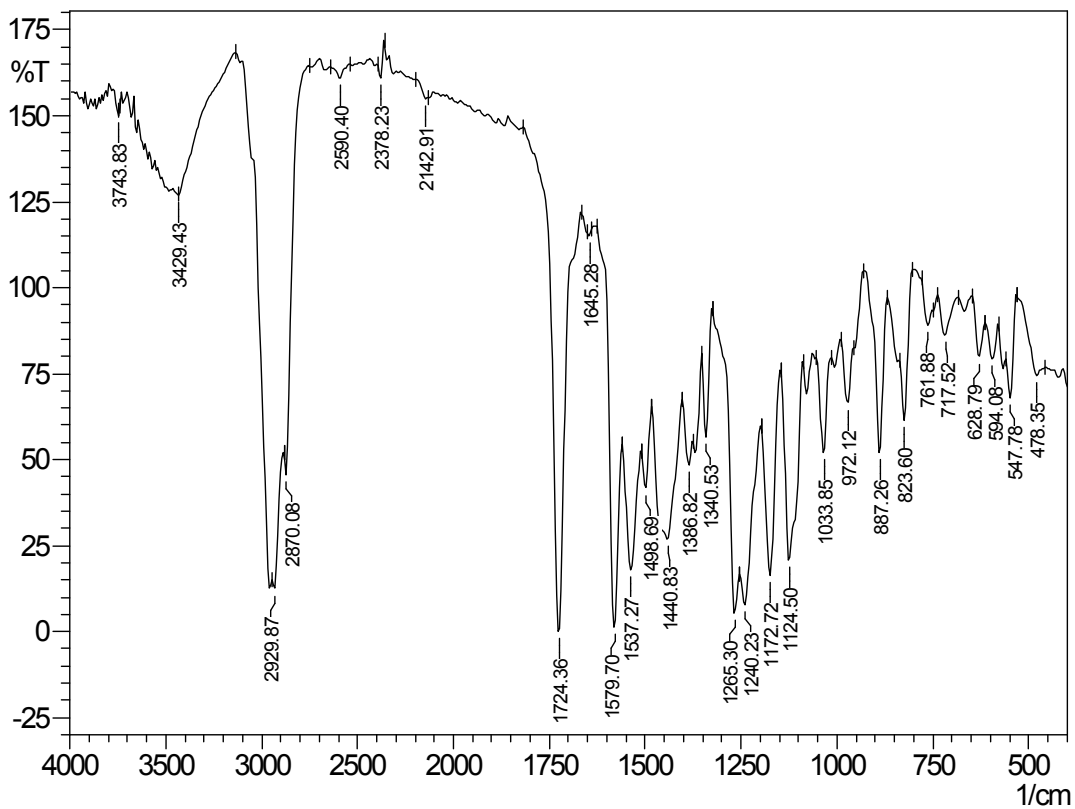

**Figure S9.** FTIR spectrum of the target compound (**3c**)

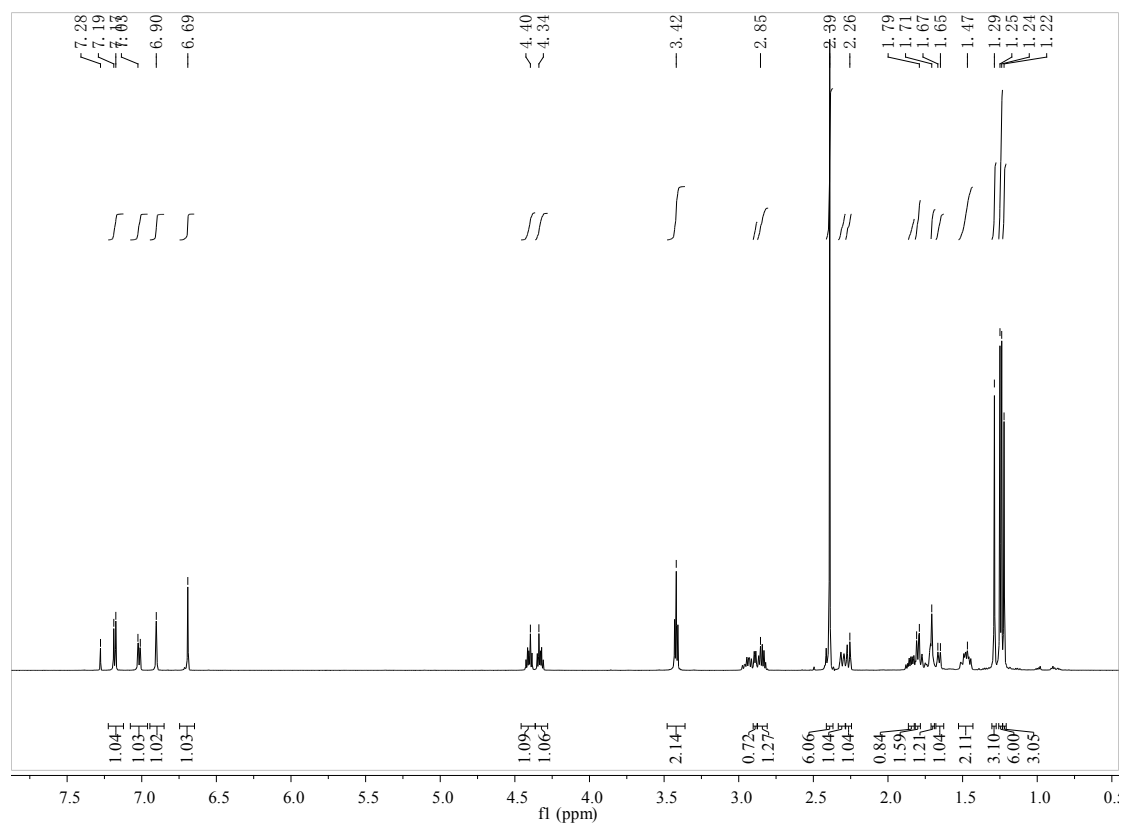

**Figure S11.**  $^{13}\text{C-NMR}$  spectrum of the target compound (**3c**) in  $\text{CDCl}_3$

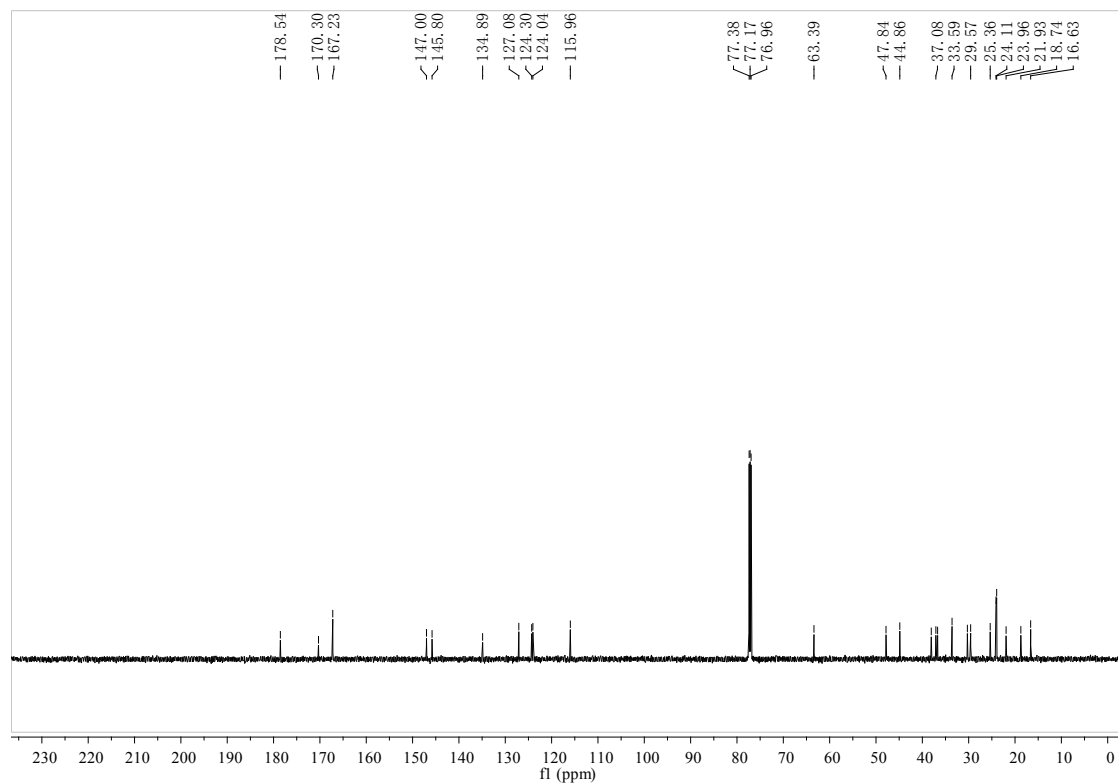

**Figure S11.**  $^{13}\text{C-NMR}$  spectrum of the target compound (**3c**) in  $\text{CDCl}_3$

|                    |                           |                               |         |                        |                                  |
|--------------------|---------------------------|-------------------------------|---------|------------------------|----------------------------------|
| <b>Sample Name</b> | LFY04                     | <b>Position</b>               | P1-A4   | <b>Instrument Name</b> | Instrument 1                     |
| <b>User Name</b>   |                           | <b>Inj Vol</b>                | 0.05    | <b>InjPosition</b>     |                                  |
| <b>Sample Type</b> | Sample                    | <b>IRM Calibration Status</b> | Success | <b>Data Filename</b>   | LFY04.d                          |
| <b>ACQ Method</b>  | yijing10-95% 8min Zheng.m | <b>Comment</b>                |         | <b>Acquired Time</b>   | 4/20/2020 3:50:11 PM (UTC+08:00) |

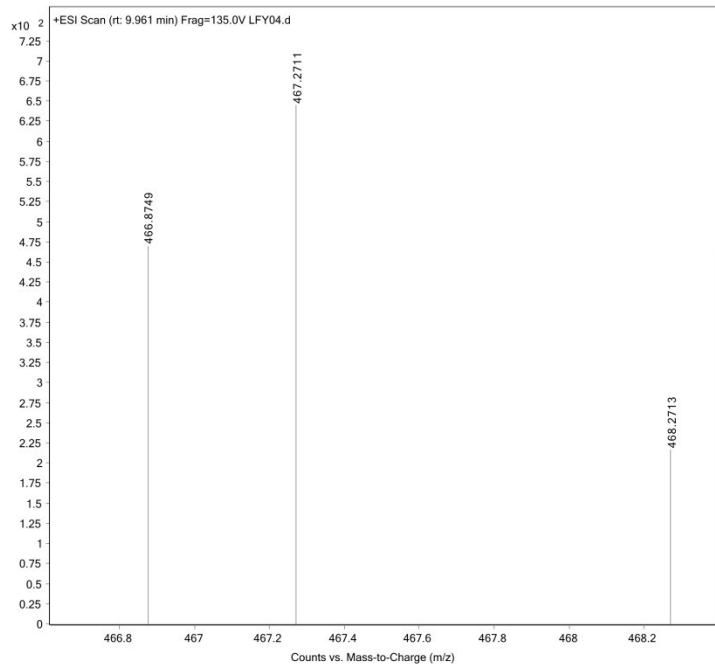

Figure S12. HR-MS spectrum of the target compound (3c)

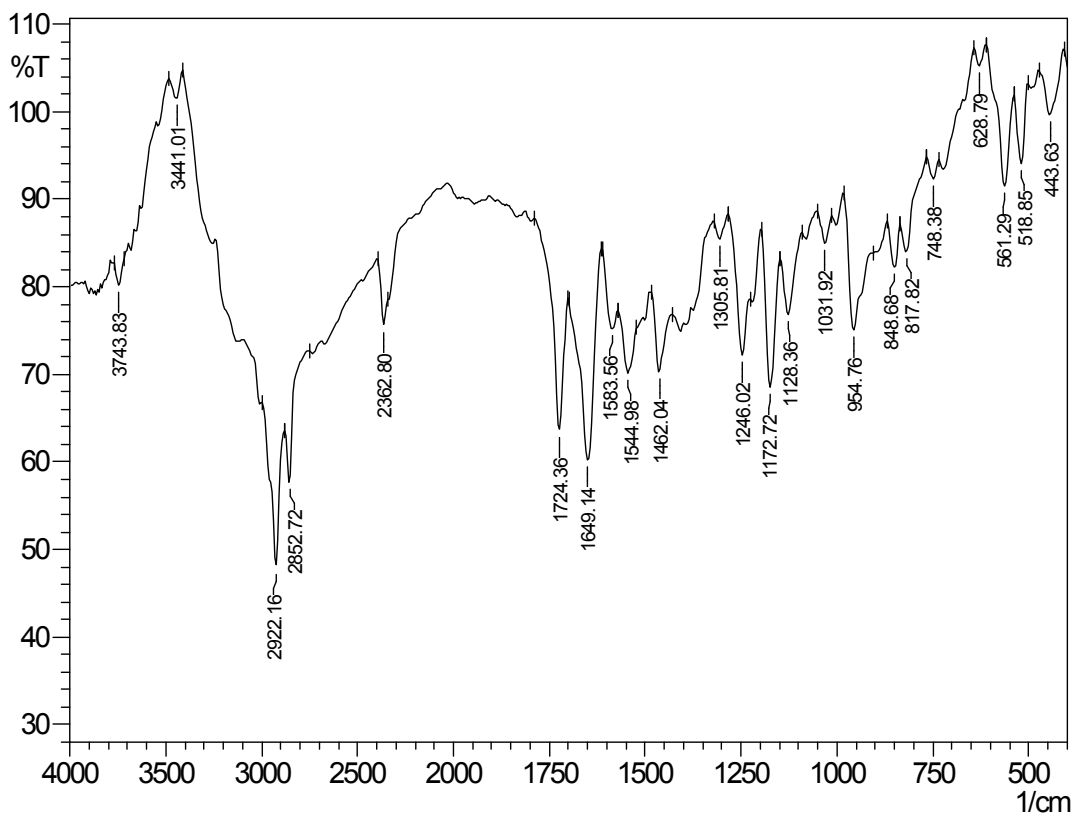

Figure S13. FTIR spectrum of the target compound (3d)

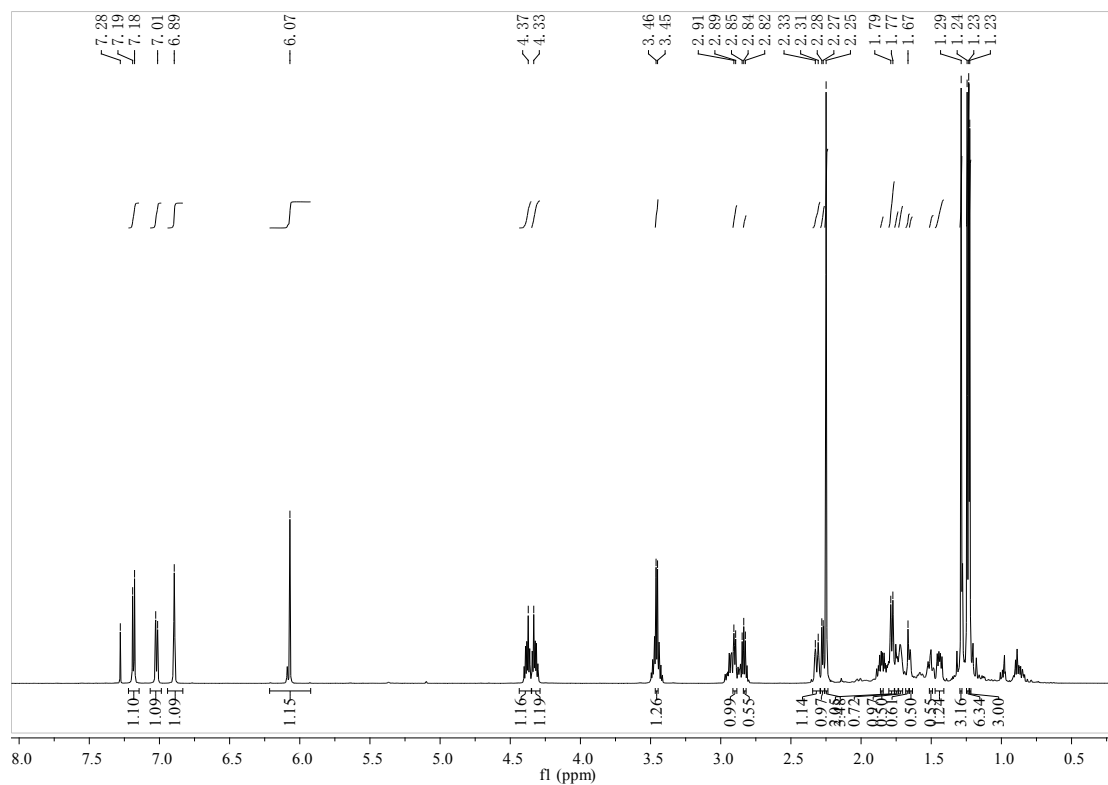

Figure S14. <sup>1</sup>H-NMR spectrum of the target compound (3d) in CDCl<sub>3</sub>

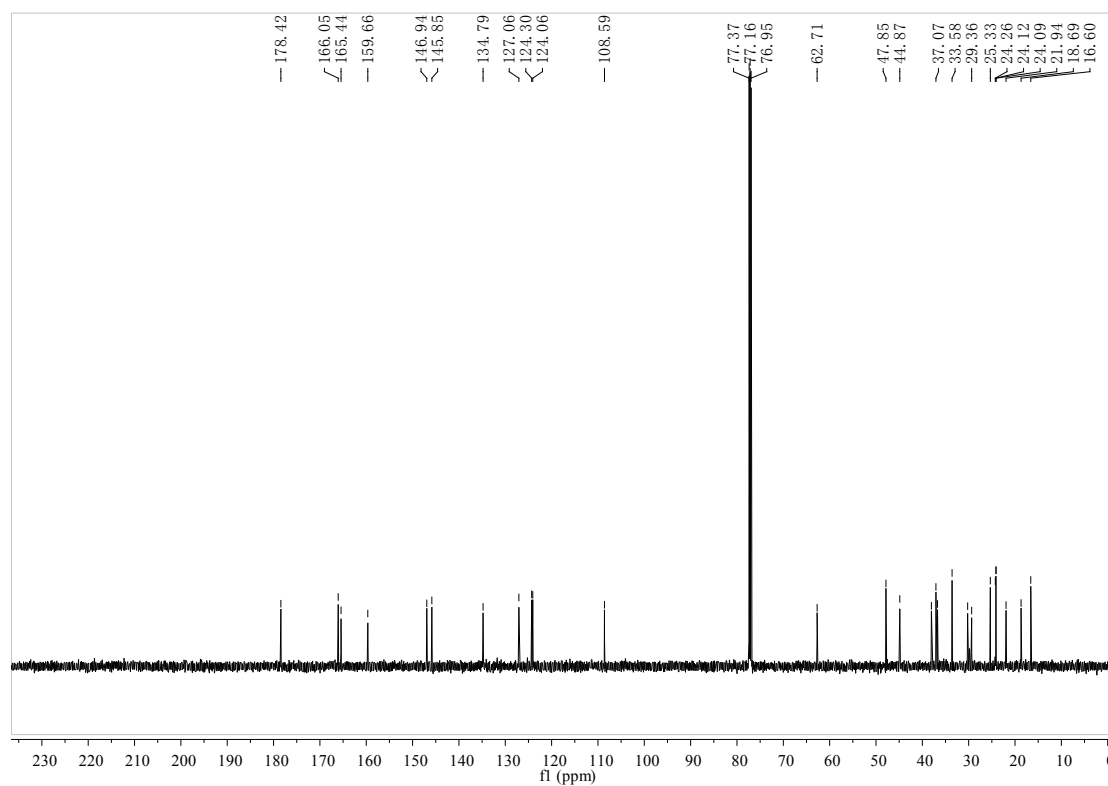

Figure S15. <sup>13</sup>C-NMR spectrum of the target compound (3d) in CDCl<sub>3</sub>



|                    |                           |                               |         |                        |                                  |
|--------------------|---------------------------|-------------------------------|---------|------------------------|----------------------------------|
| <b>Sample Name</b> | LFY03                     | <b>Position</b>               | P1-A3   | <b>Instrument Name</b> | Instrument 1                     |
| <b>User Name</b>   |                           | <b>Inj Vol</b>                | 0.05    | <b>InjPosition</b>     |                                  |
| <b>Sample Type</b> | Sample                    | <b>IRM Calibration Status</b> | Success | <b>Data Filename</b>   | LFY03.d                          |
| <b>ACQ Method</b>  | yijing10-95% 8min Zheng.m | <b>Comment</b>                |         | <b>Acquired Time</b>   | 4/20/2020 3:35:26 PM (UTC+08:00) |

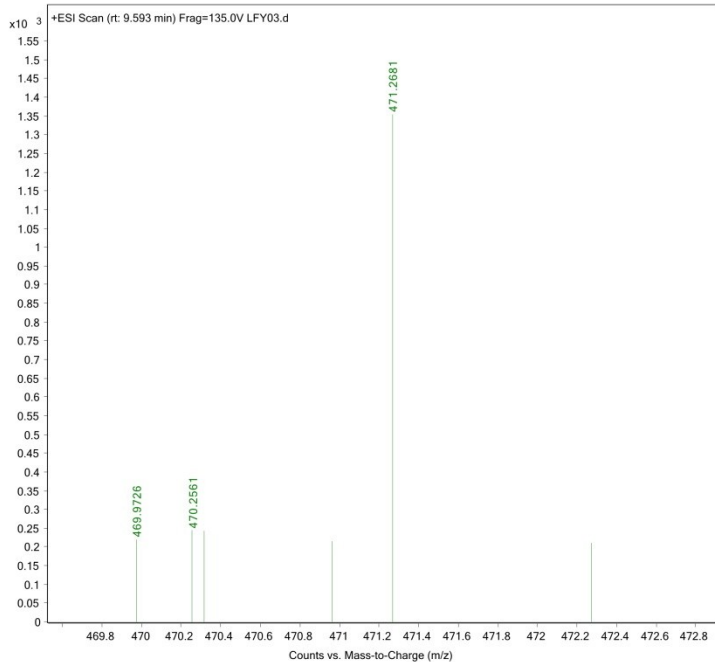

**Figure S16.** HR-MS spectrum of the target compound (**3d**)

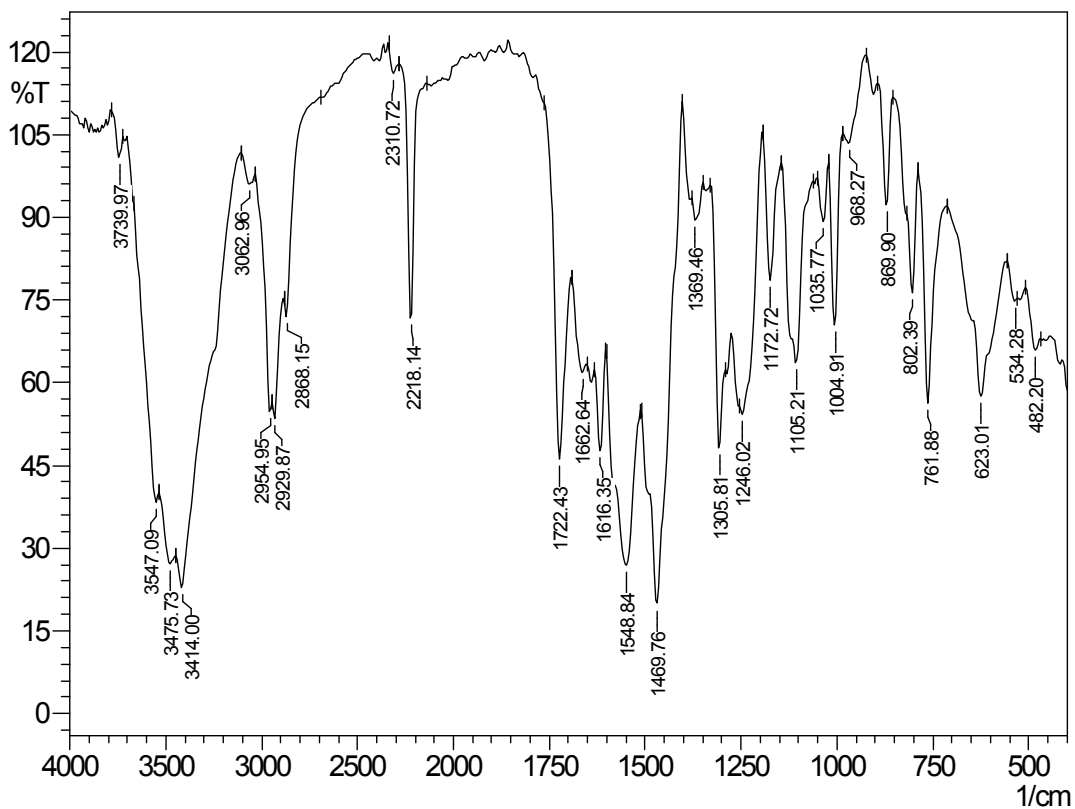

**Figure S17.** FTIR spectrum of the target compound (**3e**)

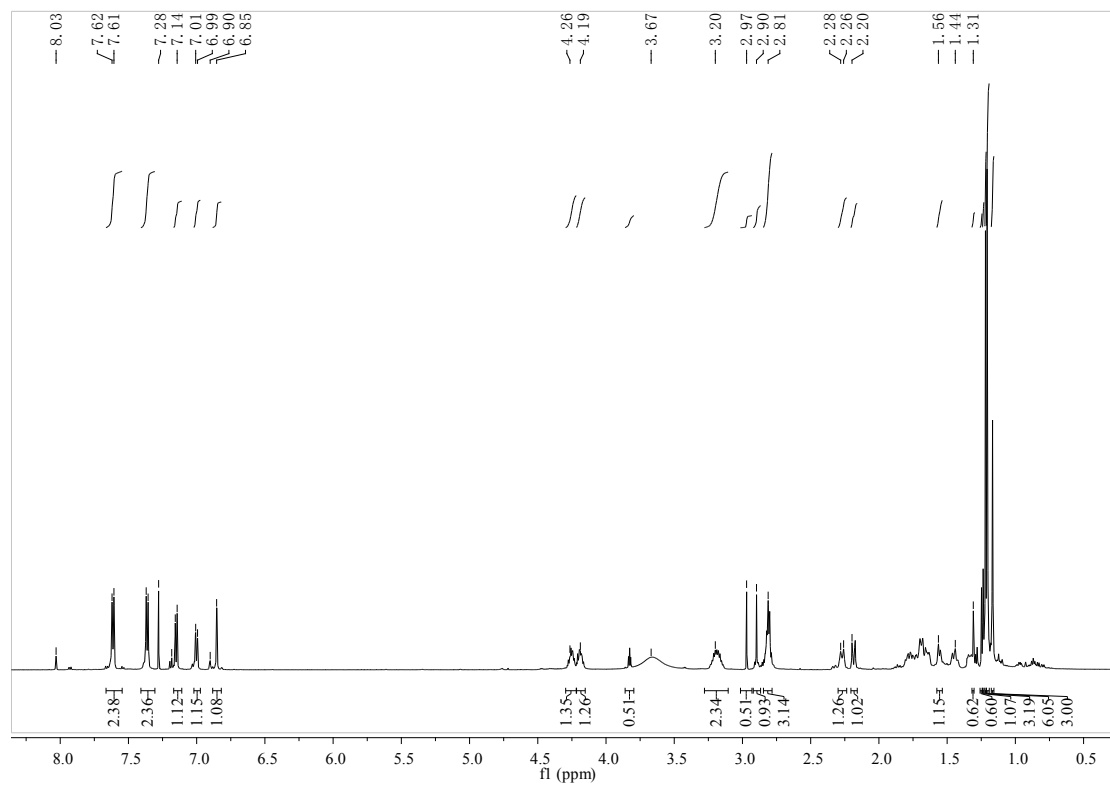

**Figure S18.**  $^1\text{H}$ -NMR spectrum of the target compound (**3e**) in  $\text{CDCl}_3$

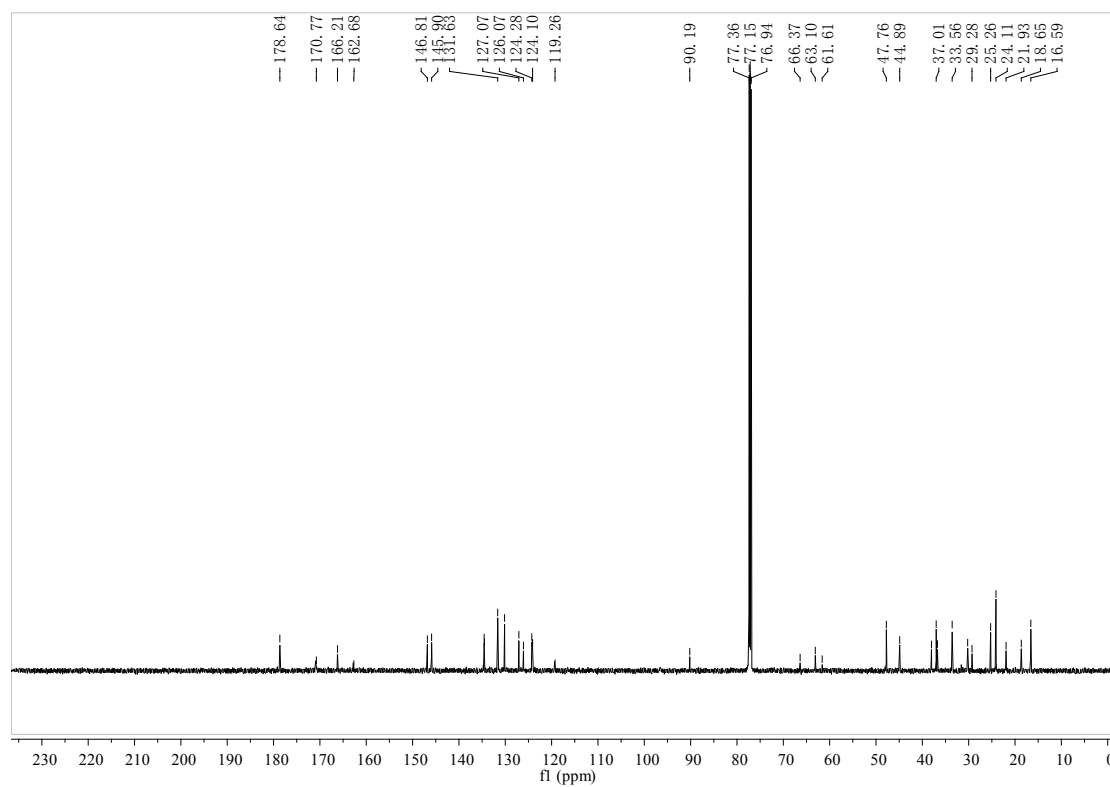

**Figure S19.**  $^{13}\text{C}$ -NMR spectrum of the target compound (**3e**) in  $\text{CDCl}_3$

|                    |                           |                               |         |                        |                      |
|--------------------|---------------------------|-------------------------------|---------|------------------------|----------------------|
| <b>Sample Name</b> | LFY05                     | <b>Position</b>               | P1-A5   | <b>Instrument Name</b> | Instrument 1         |
| <b>User Name</b>   |                           | <b>Inj Vol</b>                | 0.05    | <b>InjPosition</b>     |                      |
| <b>Sample Type</b> | Sample                    | <b>IRM Calibration Status</b> | Success | <b>Data Filename</b>   | LFY05.d              |
| <b>ACQ Method</b>  | yijing10-95% 8min Zheng.m | <b>Comment</b>                |         | <b>Acquired Time</b>   | 4/20/2020 4:04:52 PM |

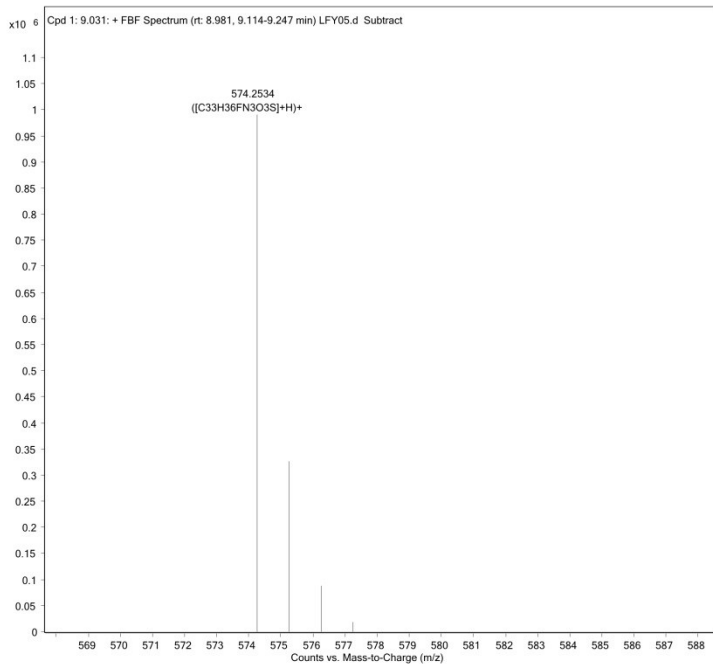

**Figure S20.**HR-MS spectrum of the target compound (**3e**)

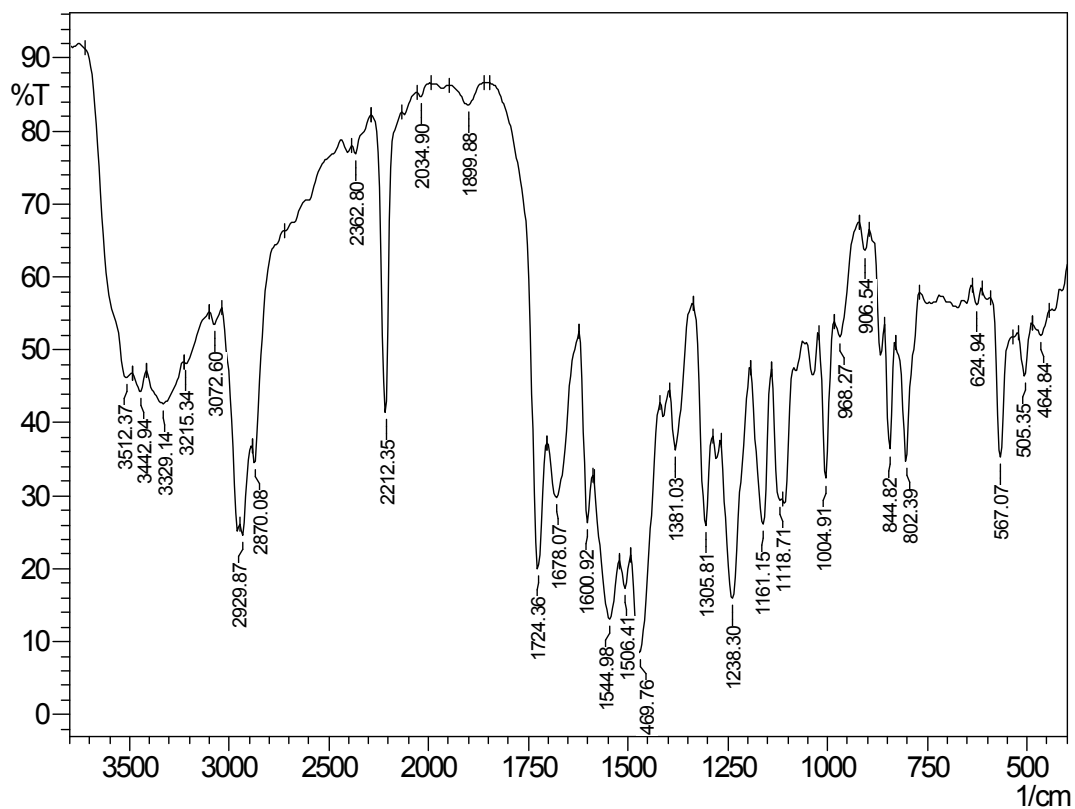

**Figure S21.** FTIR spectrum of the target compound (**3f**)

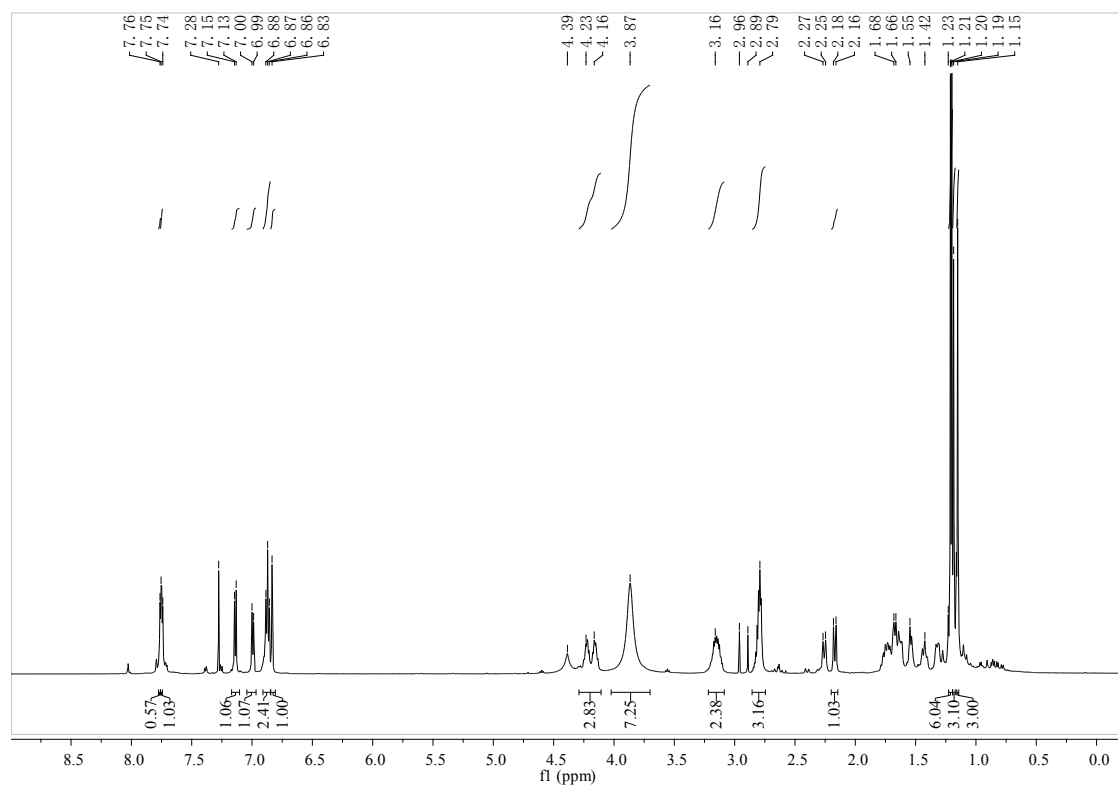

**Figure S22.**  $^1\text{H-NMR}$  spectrum of the target compound (**3f**) in  $\text{CDCl}_3$

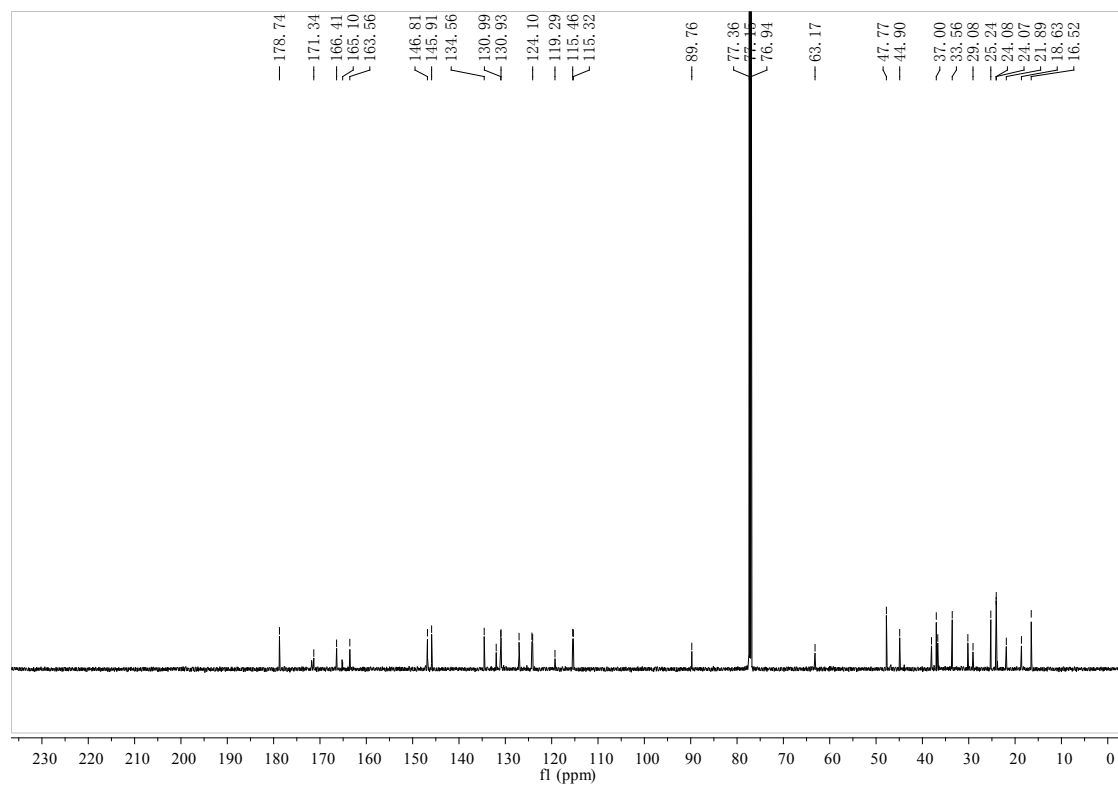

**Figure S23.**  $^{13}\text{C-NMR}$  spectrum of the target compound (**3f**) in  $\text{CDCl}_3$

|             |                           |                        |         |                 |                      |
|-------------|---------------------------|------------------------|---------|-----------------|----------------------|
| Sample Name | LFY06                     | Position               | P1-A6   | Instrument Name | Instrument 1         |
| User Name   |                           | Inj Vol                | 0.05    | InjPosition     |                      |
| Sample Type | Sample                    | IRM Calibration Status | Success | Data Filename   | LFY06.d              |
| ACQ Method  | yijing10-95% 8min Zheng.m | Comment                |         | Acquired Time   | 4/20/2020 4:19:37 PM |

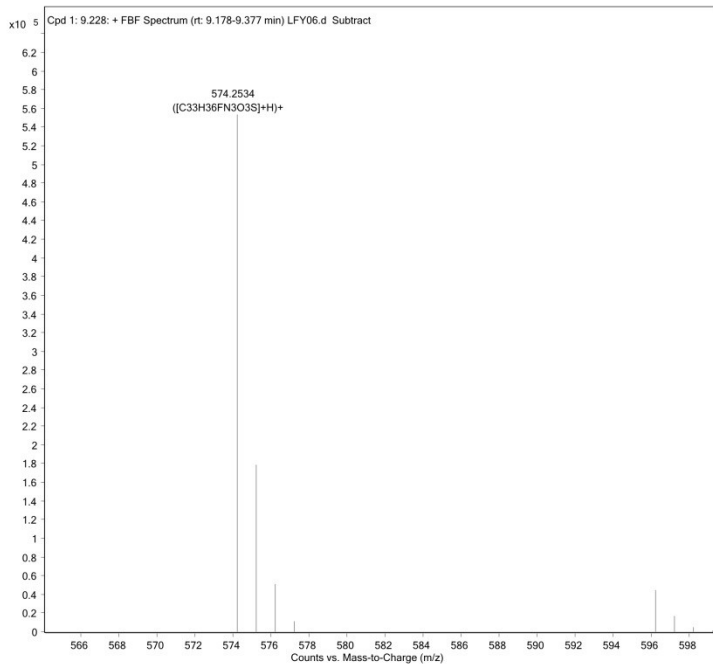

Figure S24. HR-MS spectrum of the target compound (3f)

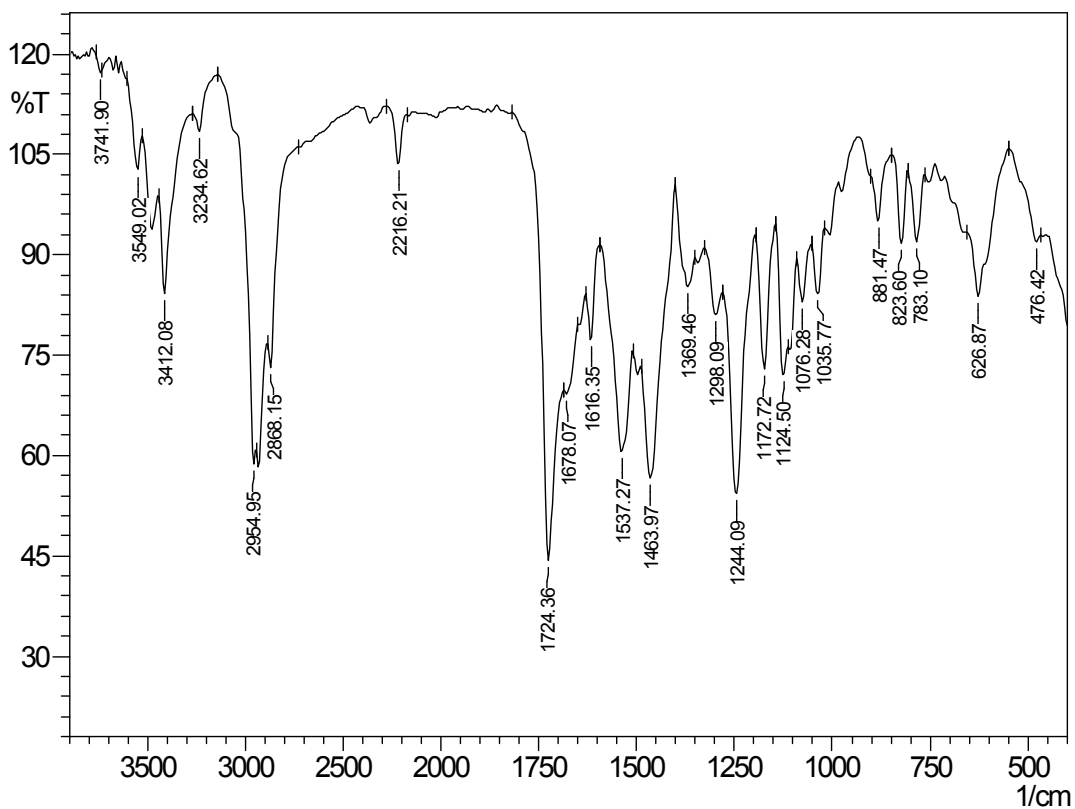

Figure S25. FTIR spectrum of the target compound (3g)

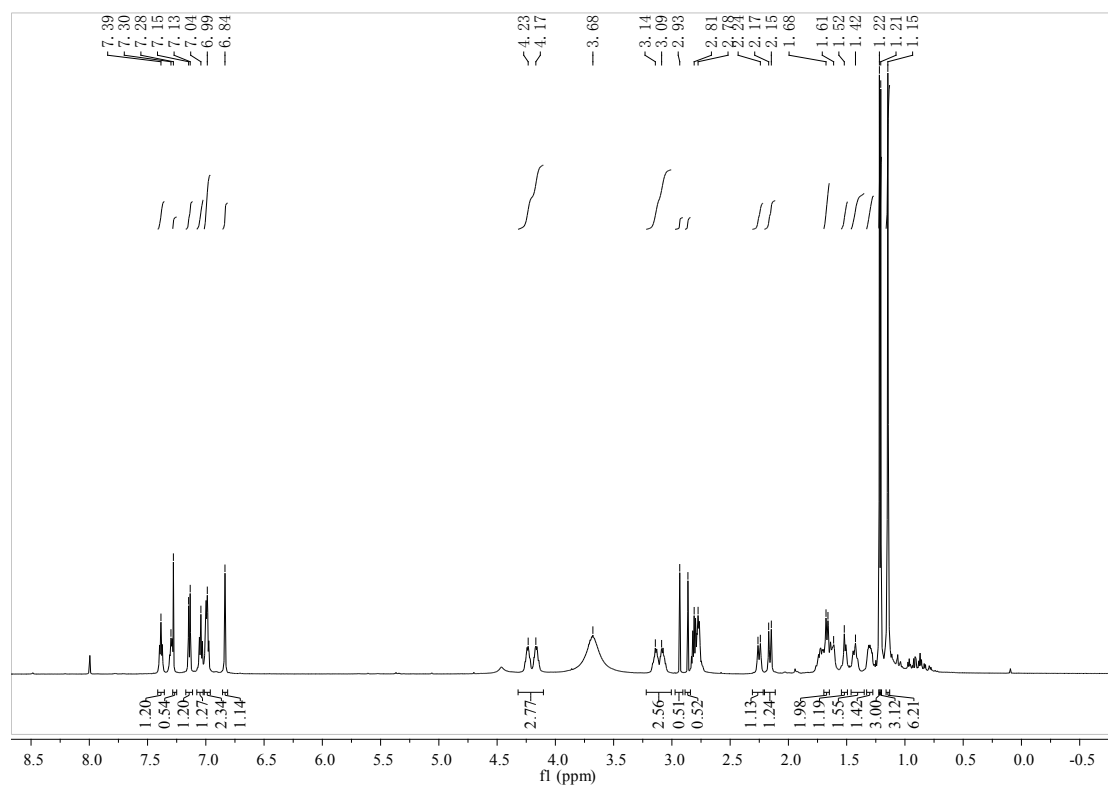

**Figure S26.**  $^1\text{H-NMR}$  spectrum of the target compound (**3g**) in  $\text{CDCl}_3$

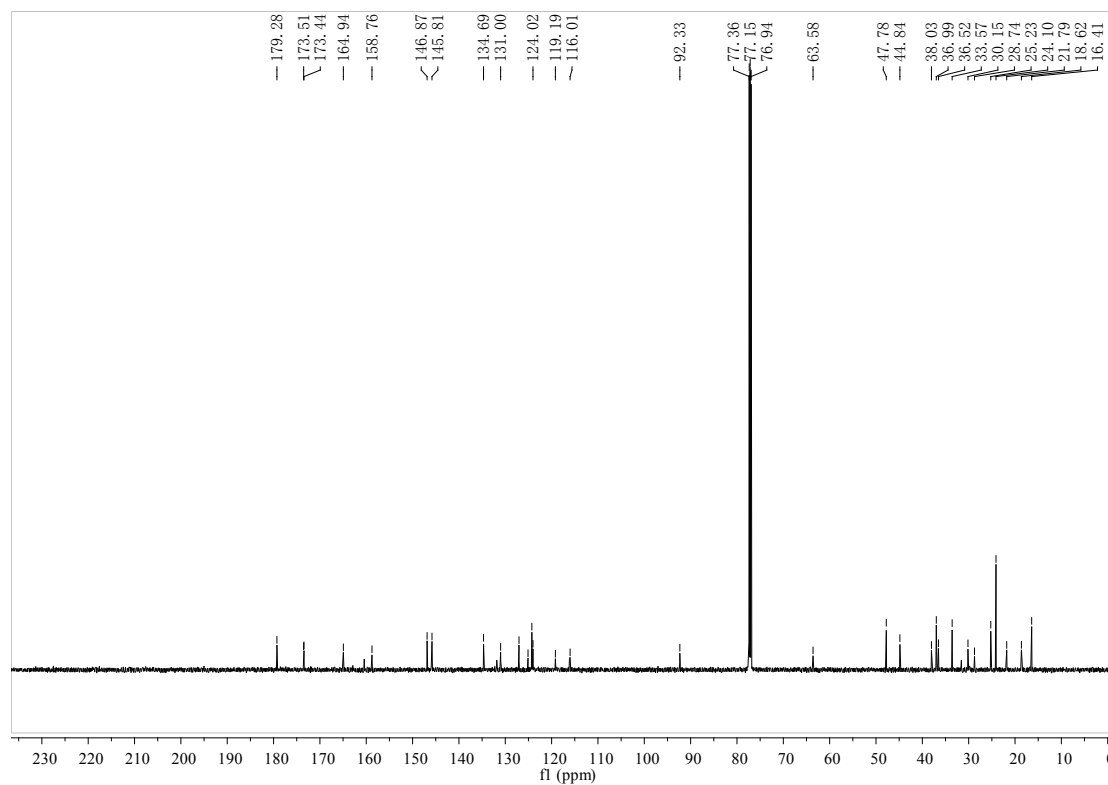

**Figure S27.**  $^{13}\text{C-NMR}$  spectrum of the target compound (**3g**) in  $\text{CDCl}_3$

|                    |                           |                               |         |                        |                      |
|--------------------|---------------------------|-------------------------------|---------|------------------------|----------------------|
| <b>Sample Name</b> | LFY07                     | <b>Position</b>               | P1-A7   | <b>Instrument Name</b> | Instrument 1         |
| <b>User Name</b>   |                           | <b>Inj Vol</b>                | 0.05    | <b>InjPosition</b>     |                      |
| <b>Sample Type</b> | Sample                    | <b>IRM Calibration Status</b> | Success | <b>Data Filename</b>   | LFY07.d              |
| <b>ACQ Method</b>  | yijing10-95% 8min Zheng.m | <b>Comment</b>                |         | <b>Acquired Time</b>   | 4/20/2020 4:34:19 PM |

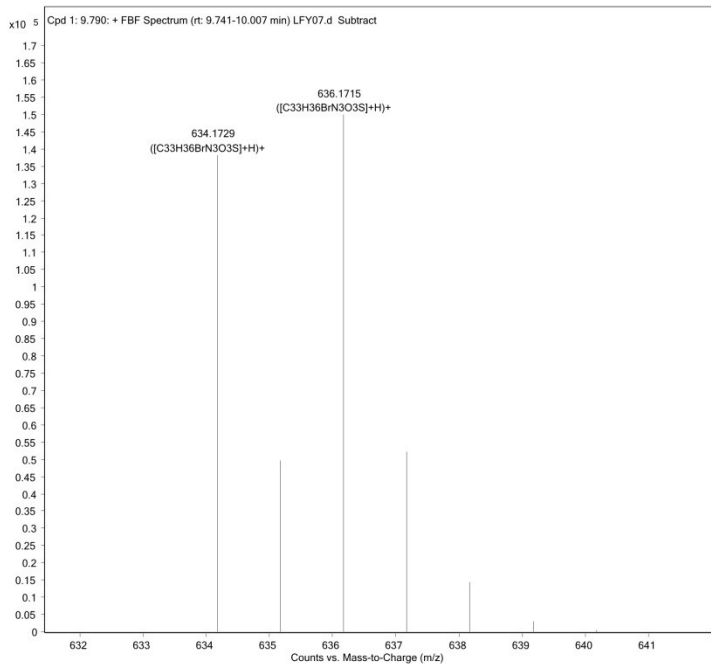

**Figure S28.** HR-MS spectrum of the target compound (**3g**)

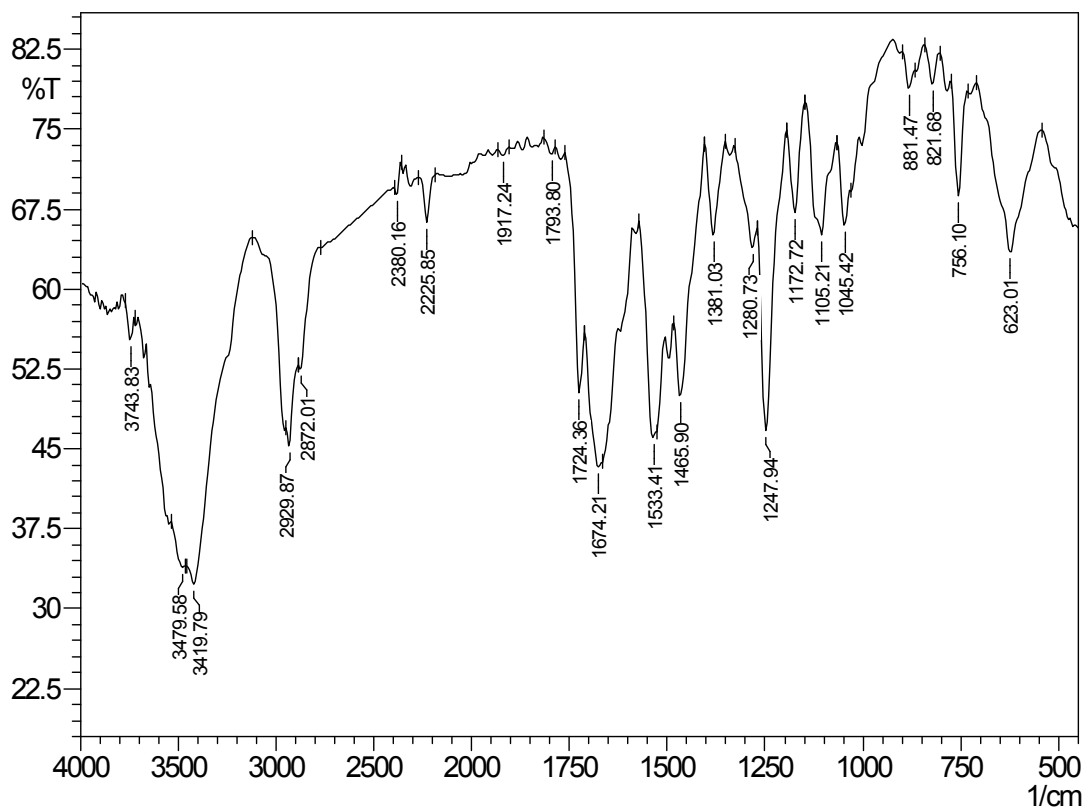

**Figure S29.** FTIR spectrum of the target compound (**3h**)

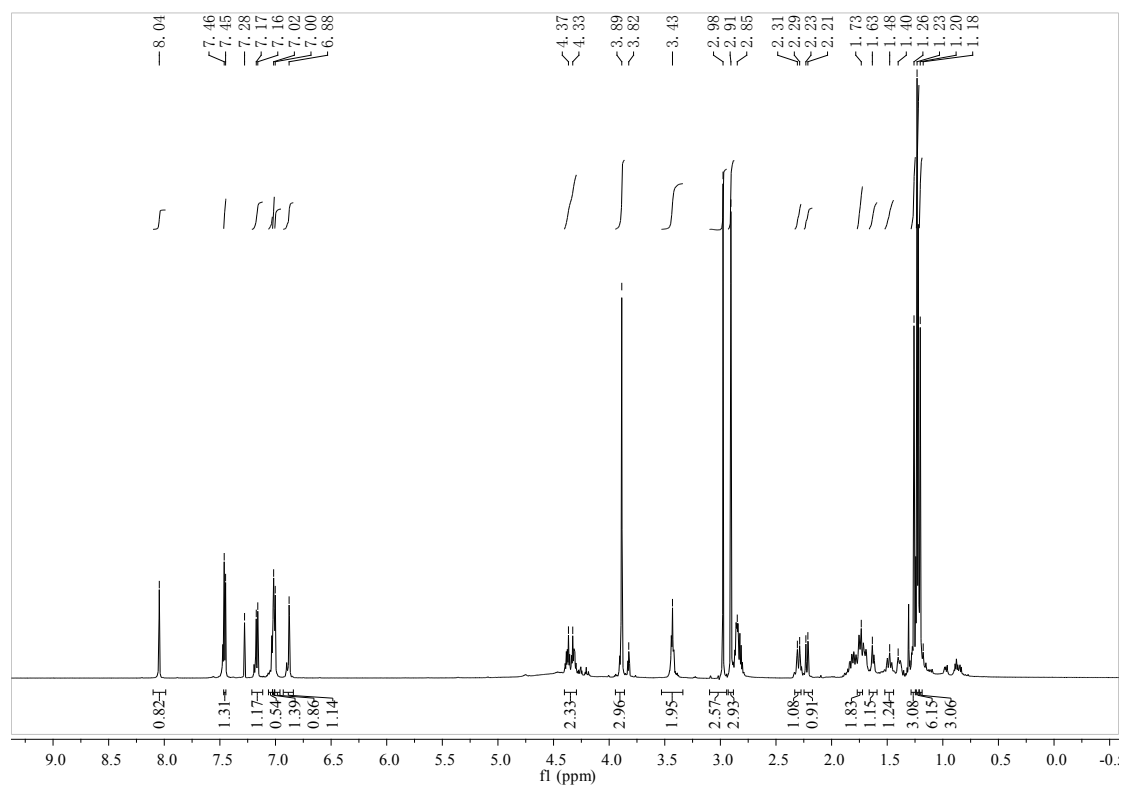

Figure S30.  $^1\text{H-NMR}$  spectrum of the target compound (**3h**) in  $\text{CDCl}_3$

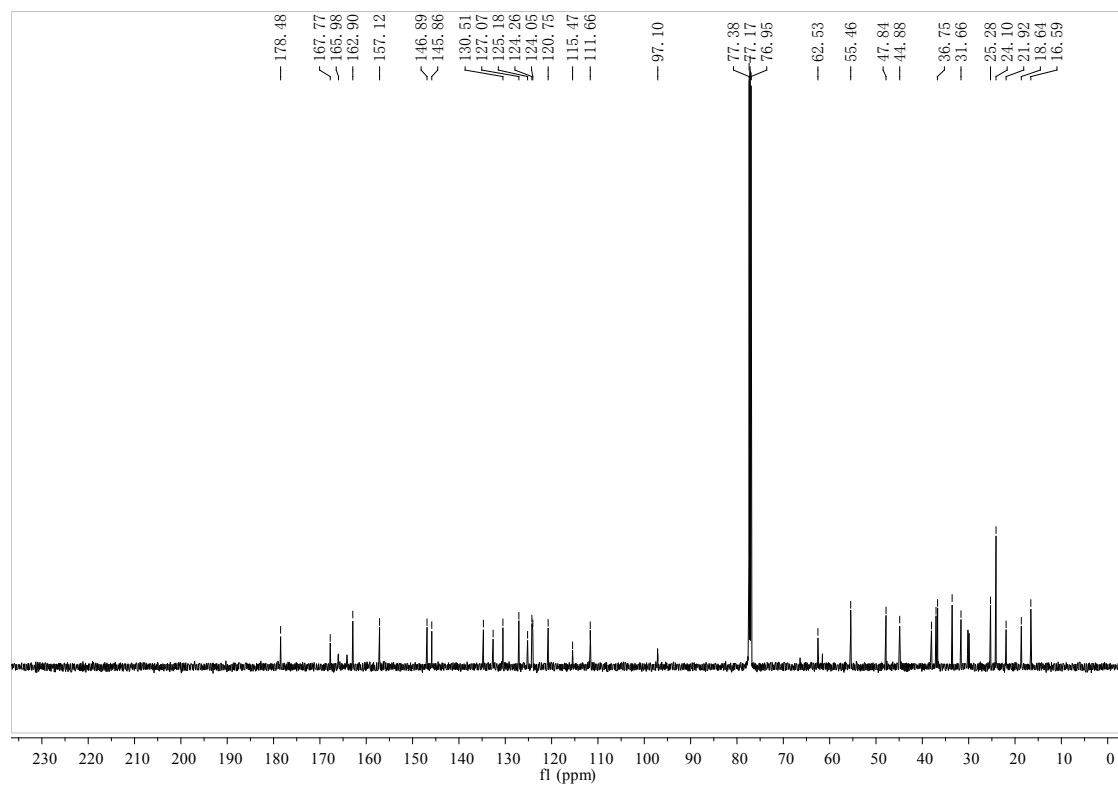

Figure S31.  $^{13}\text{C-NMR}$  spectrum of the target compound (**3h**) in  $\text{CDCl}_3$



|                    |                           |                               |         |                        |                      |
|--------------------|---------------------------|-------------------------------|---------|------------------------|----------------------|
| <b>Sample Name</b> | LFY08                     | <b>Position</b>               | P1-A8   | <b>Instrument Name</b> | Instrument 1         |
| <b>User Name</b>   |                           | <b>Inj Vol</b>                | 0.05    | <b>InjPosition</b>     |                      |
| <b>Sample Type</b> | Sample                    | <b>IRM Calibration Status</b> | Success | <b>Data Filename</b>   | LFY08.d              |
| <b>ACQ Method</b>  | yijing10-95% 8min Zheng.m | <b>Comment</b>                |         | <b>Acquired Time</b>   | 4/20/2020 4:49:04 PM |

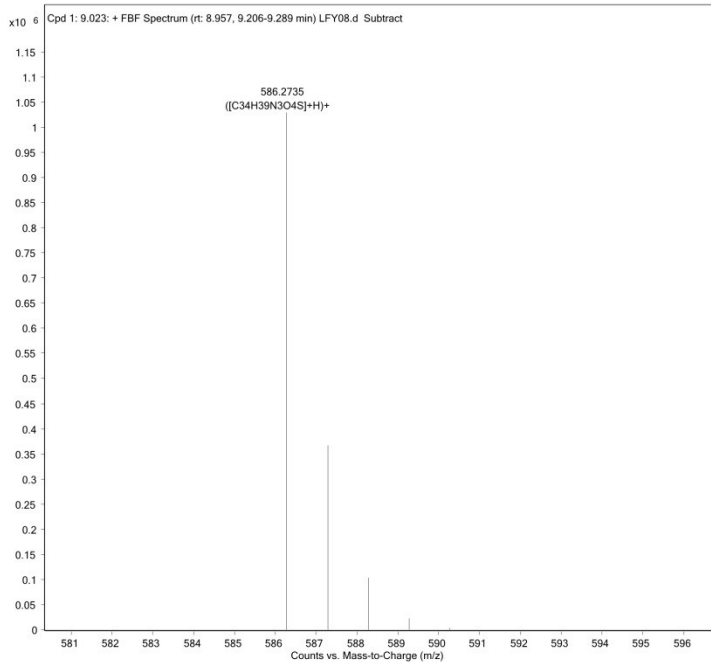

**Figure S32.** HR-MS spectrum of the target compound (**3h**)

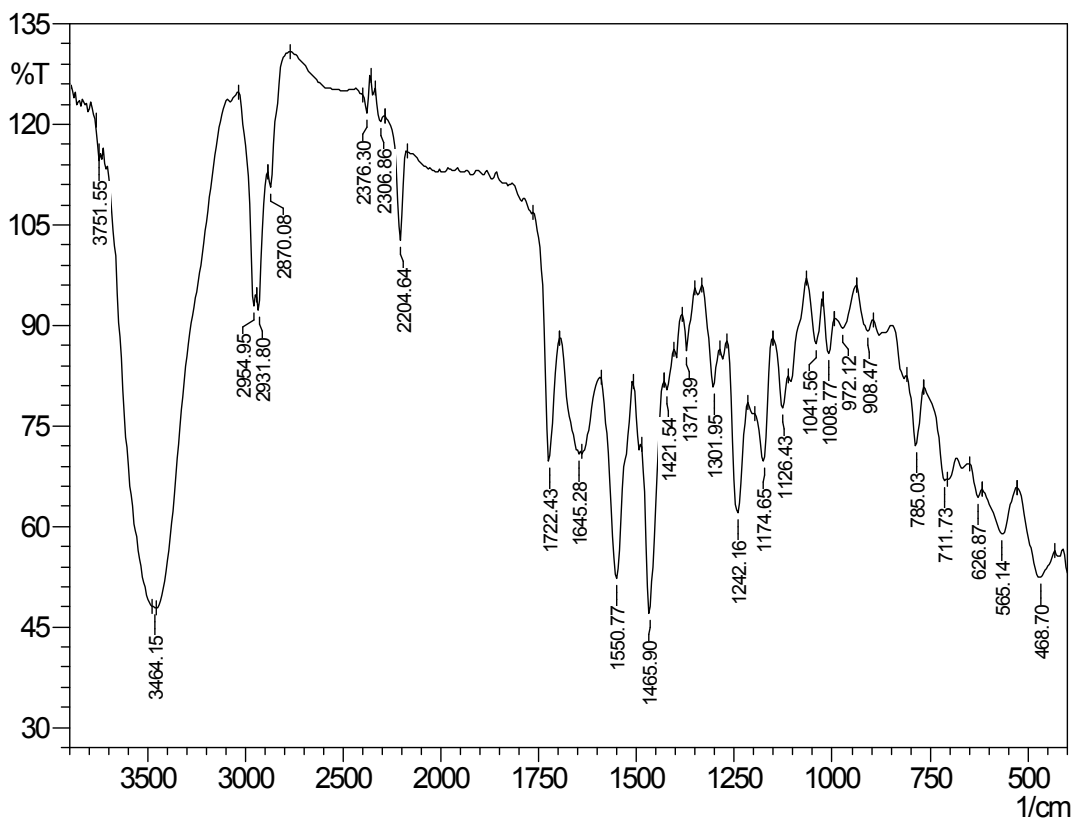

**Figure S33.** FTIR spectrum of the target compound (**3i**)

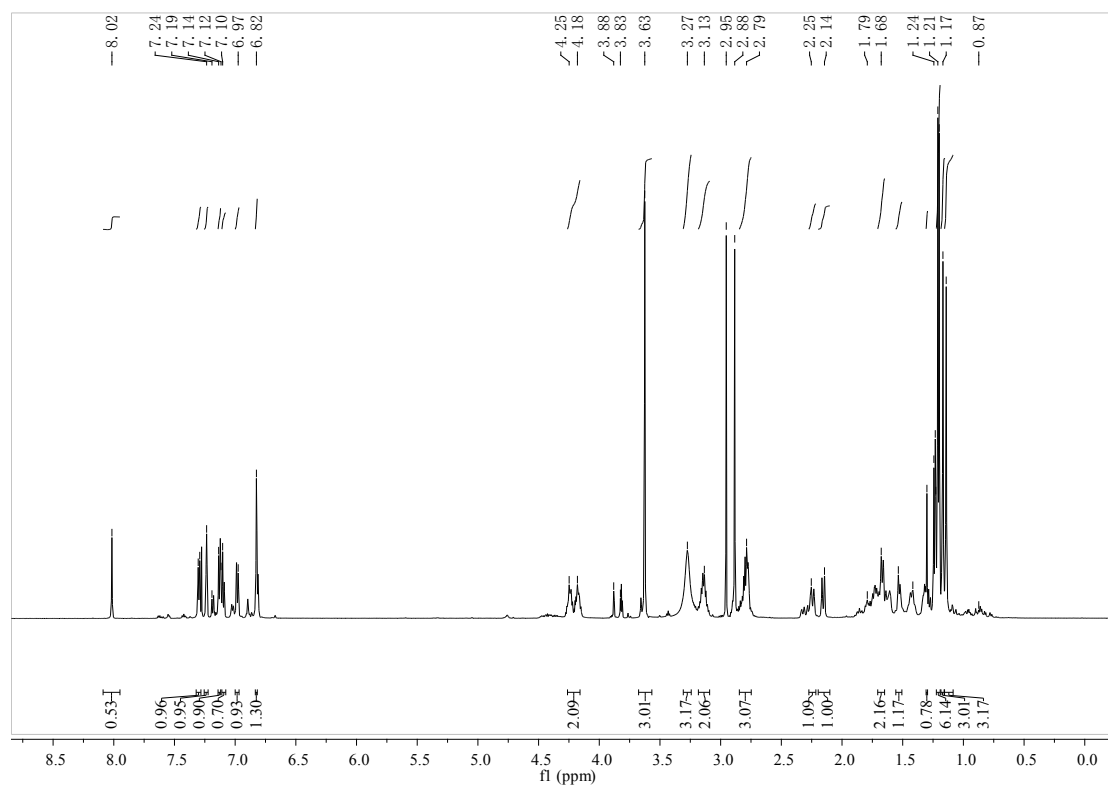

Figure S34.  $^1\text{H-NMR}$  spectrum of the target compound (**3i**) in  $\text{CDCl}_3$

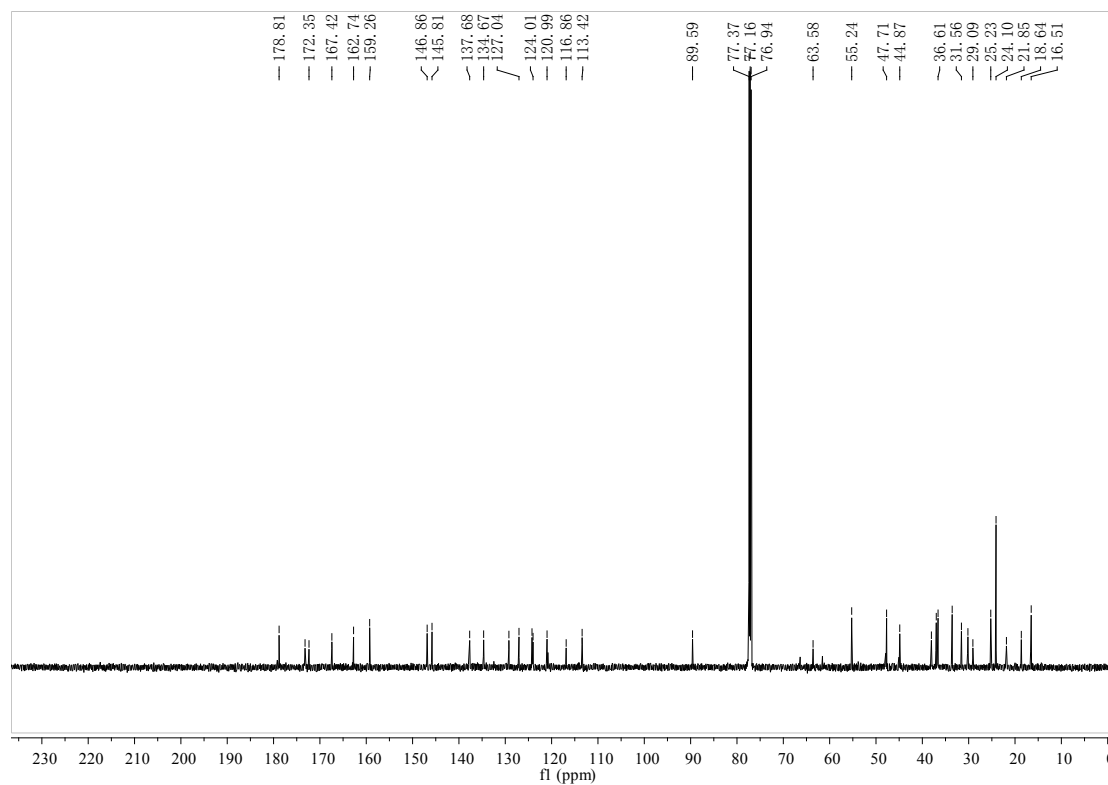

Figure S35.  $^{13}\text{C-NMR}$  spectrum of the target compound (**3i**) in  $\text{CDCl}_3$

|                    |                           |                               |         |                        |                      |
|--------------------|---------------------------|-------------------------------|---------|------------------------|----------------------|
| <b>Sample Name</b> | LFY09                     | <b>Position</b>               | P1-A9   | <b>Instrument Name</b> | Instrument 1         |
| <b>User Name</b>   |                           | <b>Inj Vol</b>                | 0.05    | <b>InjPosition</b>     |                      |
| <b>Sample Type</b> | Sample                    | <b>IRM Calibration Status</b> | Success | <b>Data Filename</b>   | LFY09.d              |
| <b>ACQ Method</b>  | yijing10-95% 8min Zheng.m | <b>Comment</b>                |         | <b>Acquired Time</b>   | 4/20/2020 5:03:46 PM |

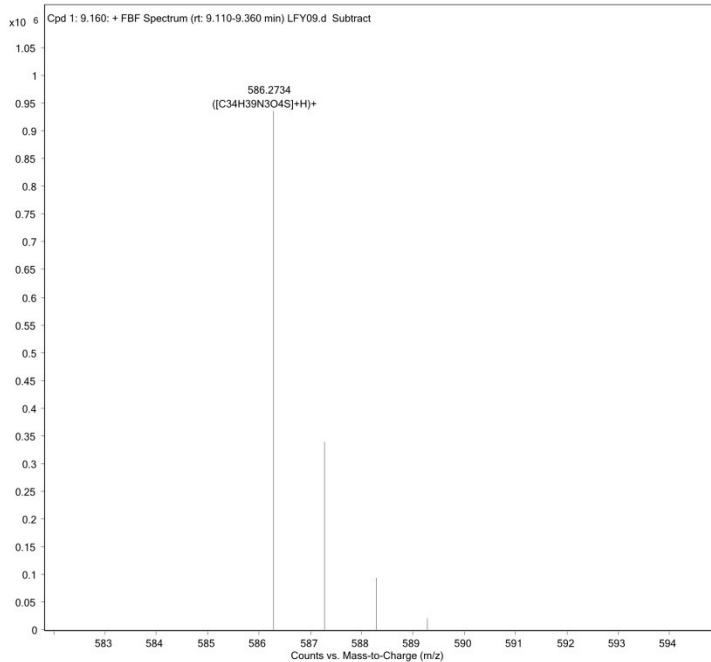

**Figure S36.** HR-MS spectrum of the target compound (**3i**)

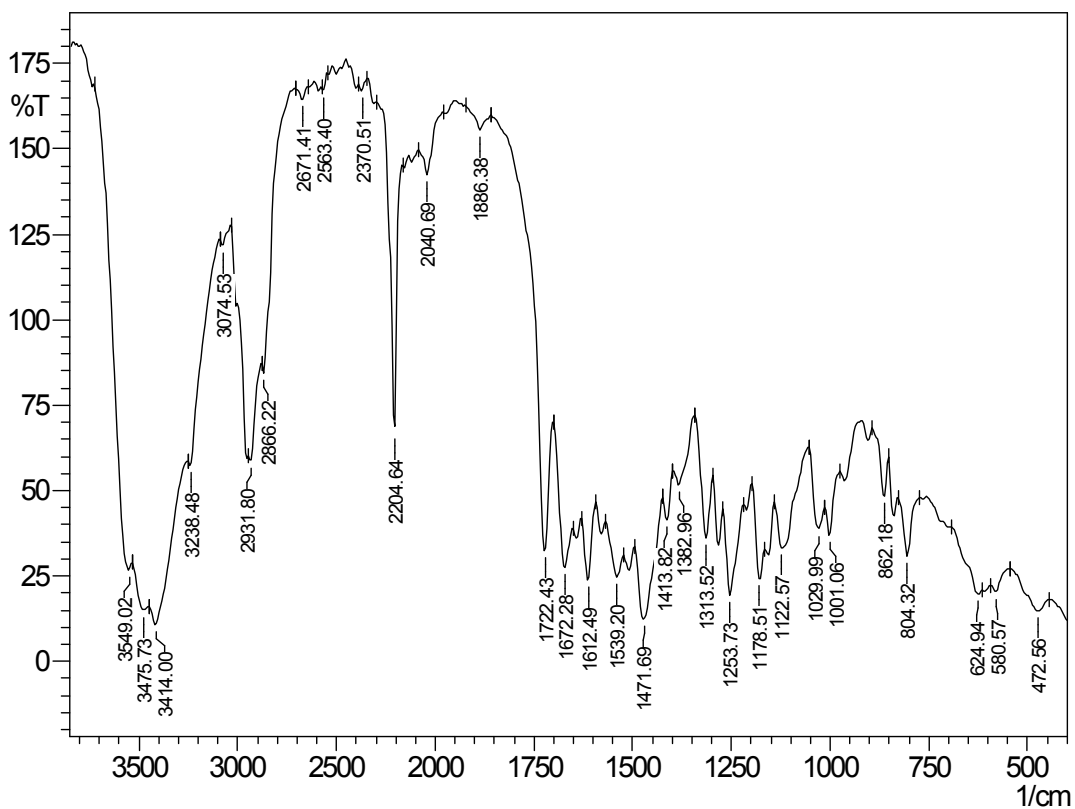

**Figure S37.** FTIR spectrum of the target compound (**3j**)

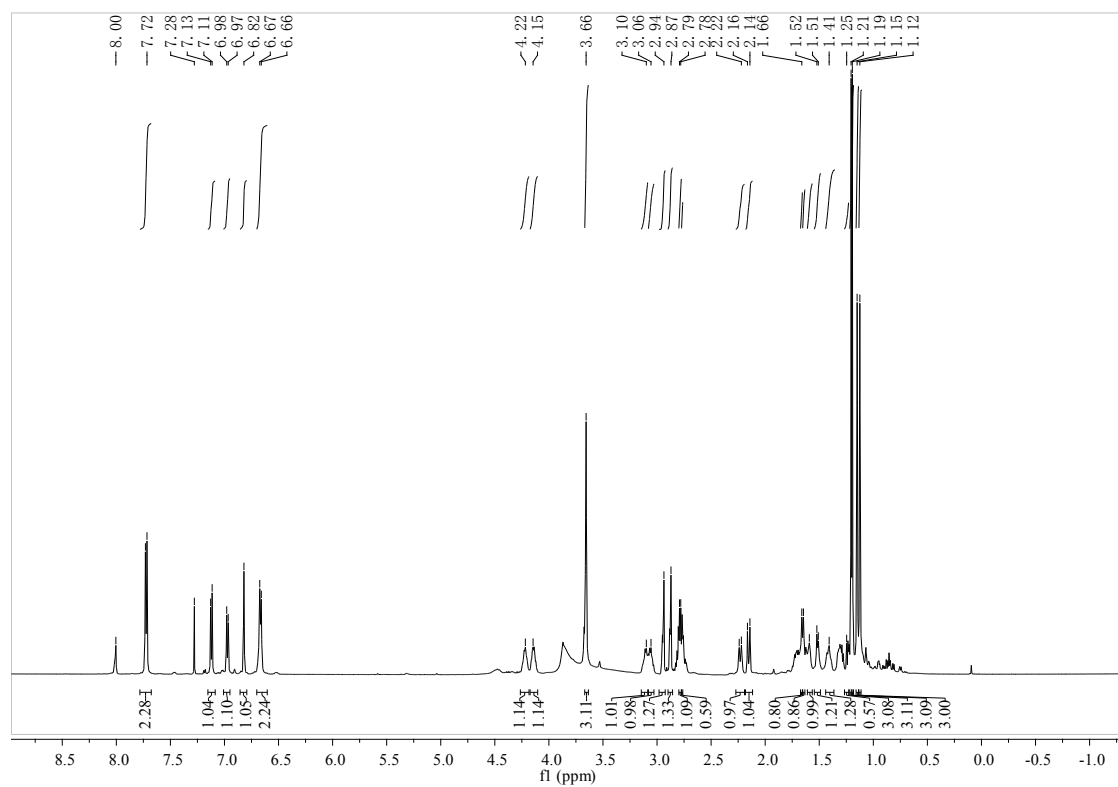

**Figure S38.**  $^1\text{H-NMR}$  spectrum of the target compound (**3j**) in  $\text{CDCl}_3$

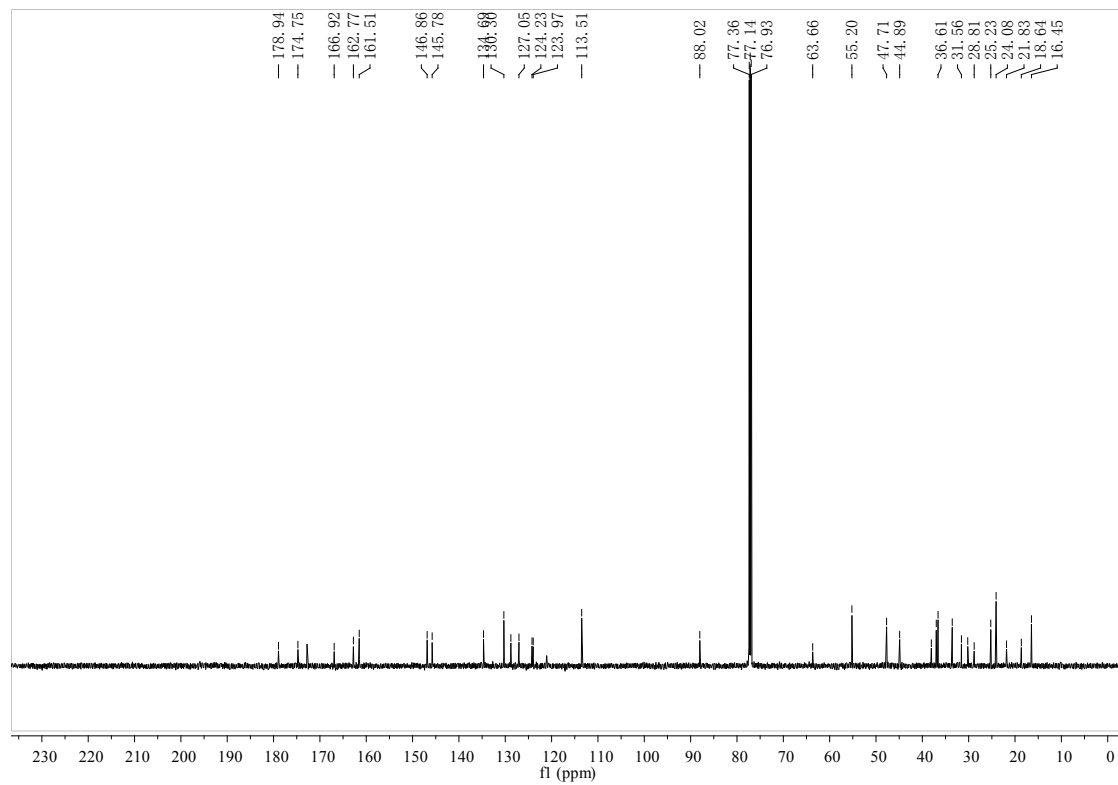

**Figure S39.**  $^{13}\text{C-NMR}$  spectrum of the target compound (**3j**) in  $\text{CDCl}_3$

|             |                           |                        |         |                 |                      |
|-------------|---------------------------|------------------------|---------|-----------------|----------------------|
| Sample Name | LFY10                     | Position               | P1-B1   | Instrument Name | Instrument 1         |
| User Name   |                           | Inj Vol                | 0.05    | InjPosition     |                      |
| Sample Type | Sample                    | IRM Calibration Status | Success | Data Filename   | LFY10.d              |
| ACQ Method  | yijing10-95% 8min Zheng.m | Comment                |         | Acquired Time   | 4/20/2020 5:18:29 PM |

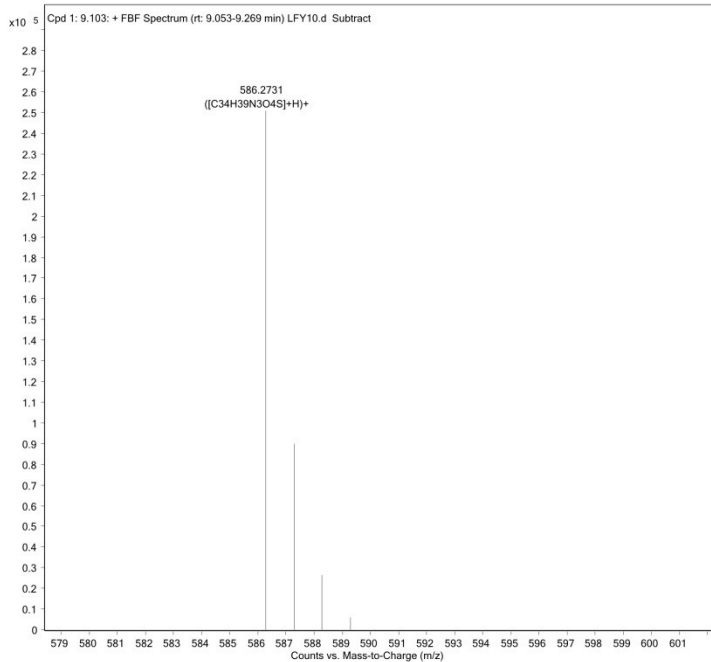

Figure S40. HR-MS spectrum of the target compound (3j)

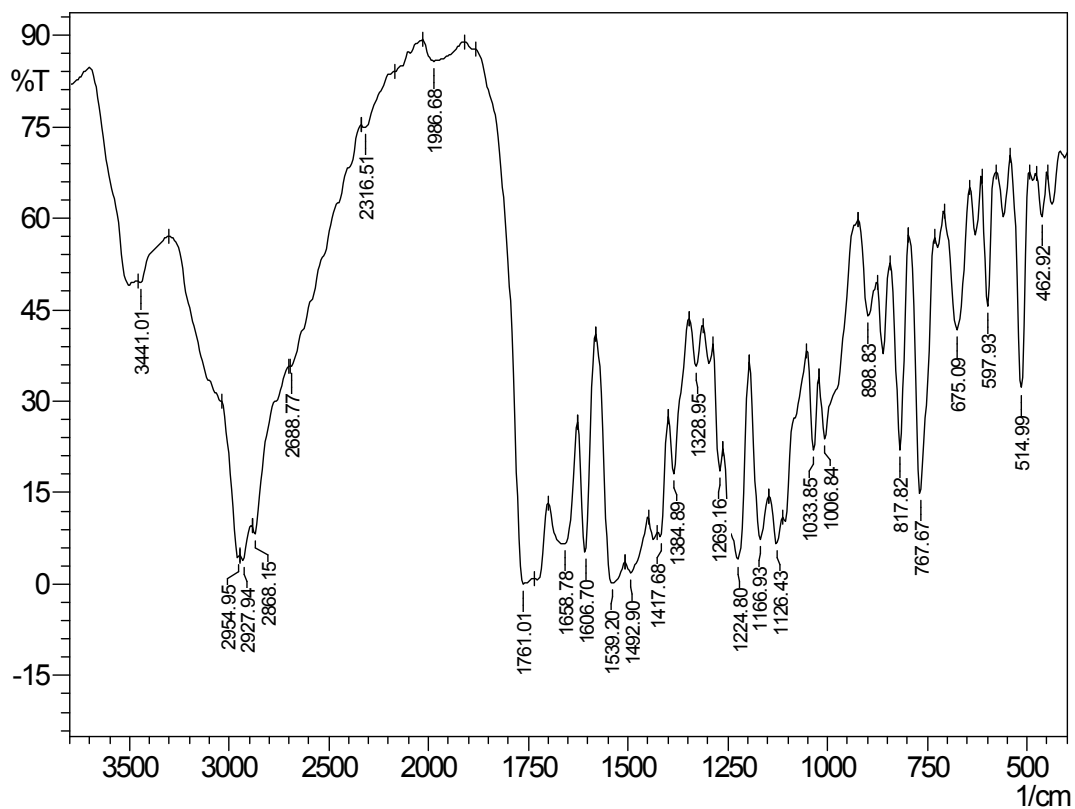

Figure S41. FTIR spectrum of the target compound (3k)

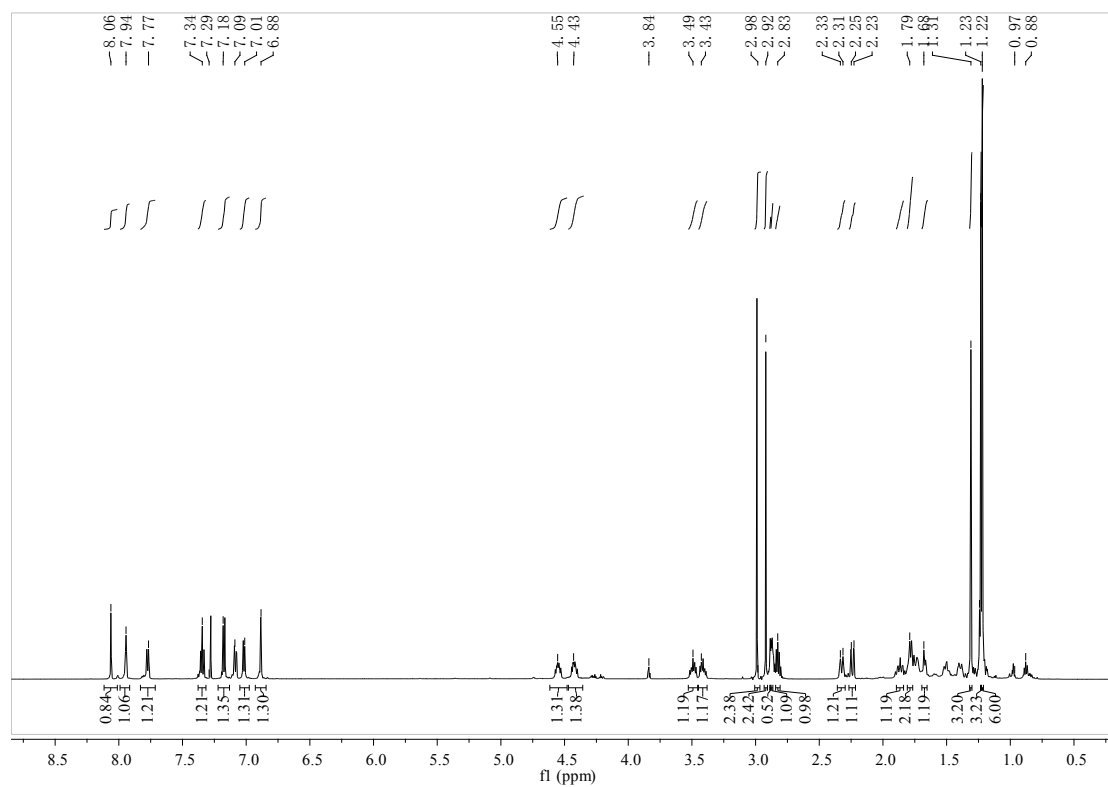

**Figure S42.**  $^1\text{H-NMR}$  spectrum of the target compound (**3k**) in  $\text{CDCl}_3$

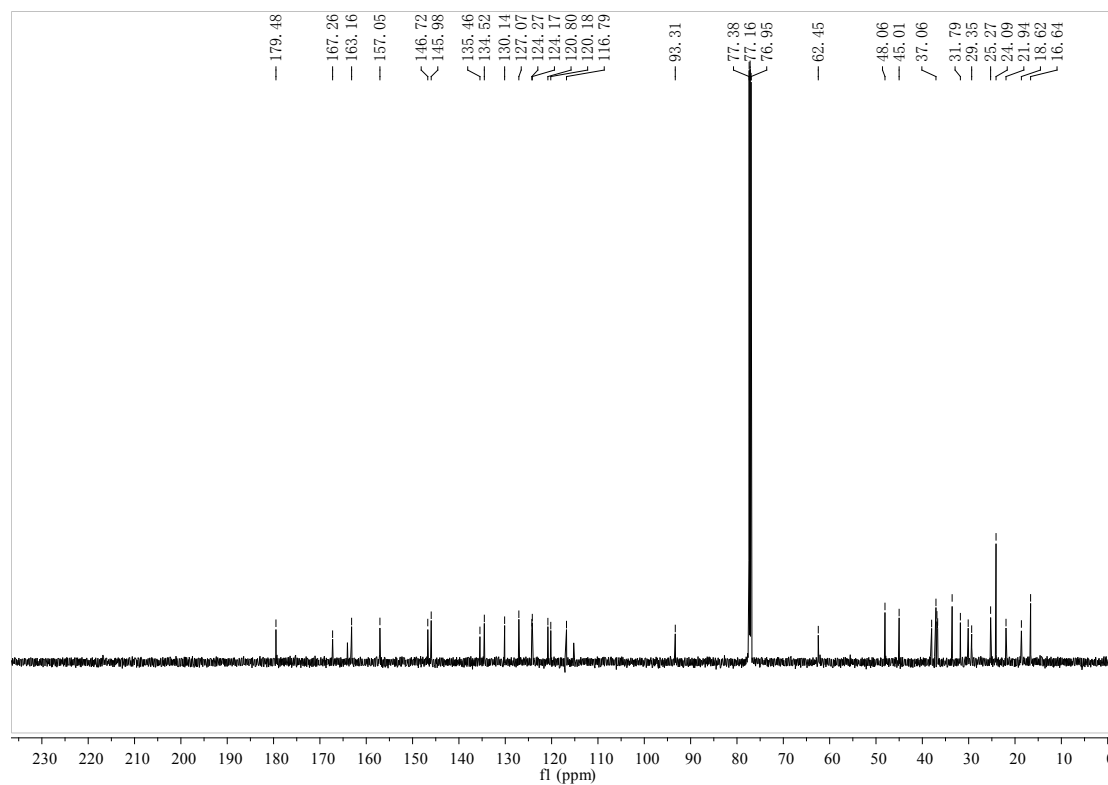

**Figure S43.**  $^{13}\text{C-NMR}$  spectrum of the target compound (**3k**) in  $\text{CDCl}_3$

|                    |                           |                               |         |                        |                      |
|--------------------|---------------------------|-------------------------------|---------|------------------------|----------------------|
| <b>Sample Name</b> | LFY11                     | <b>Position</b>               | P1-B2   | <b>Instrument Name</b> | Instrument 1         |
| <b>User Name</b>   |                           | <b>Inj Vol</b>                | 0.05    | <b>InjPosition</b>     |                      |
| <b>Sample Type</b> | Sample                    | <b>IRM Calibration Status</b> | Success | <b>Data Filename</b>   | LFY11.d              |
| <b>ACQ Method</b>  | yijing10-95% 8min Zheng.m | <b>Comment</b>                |         | <b>Acquired Time</b>   | 4/20/2020 5:33:14 PM |

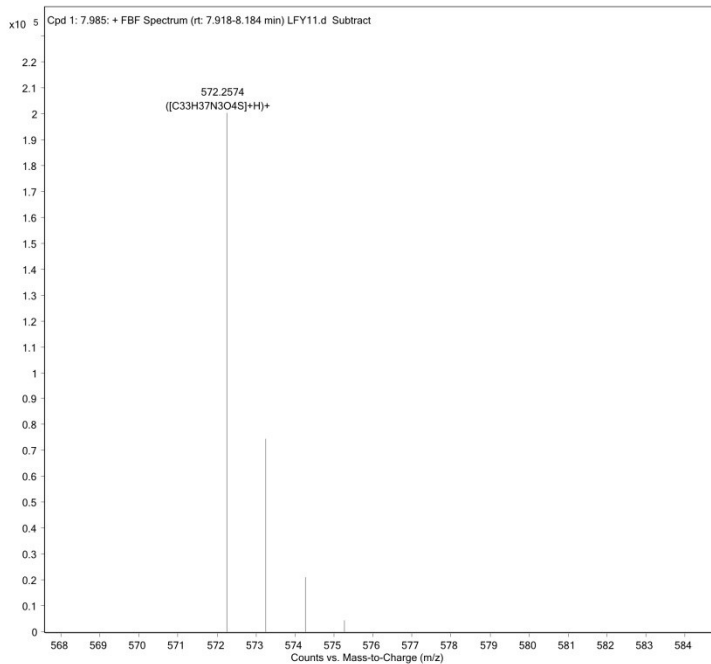

**Figure S44.** HR-MS spectrum of the target compound (**3k**)

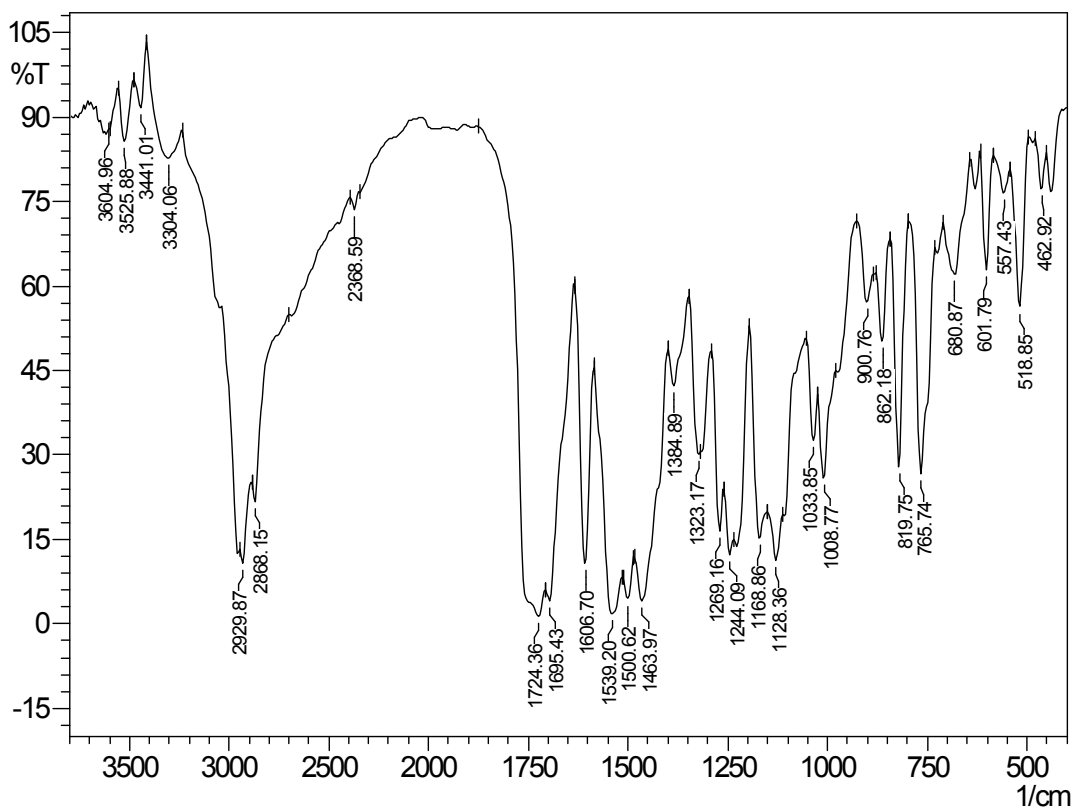

**Figure S45.** FTIR spectrum of the target compound (**3l**)

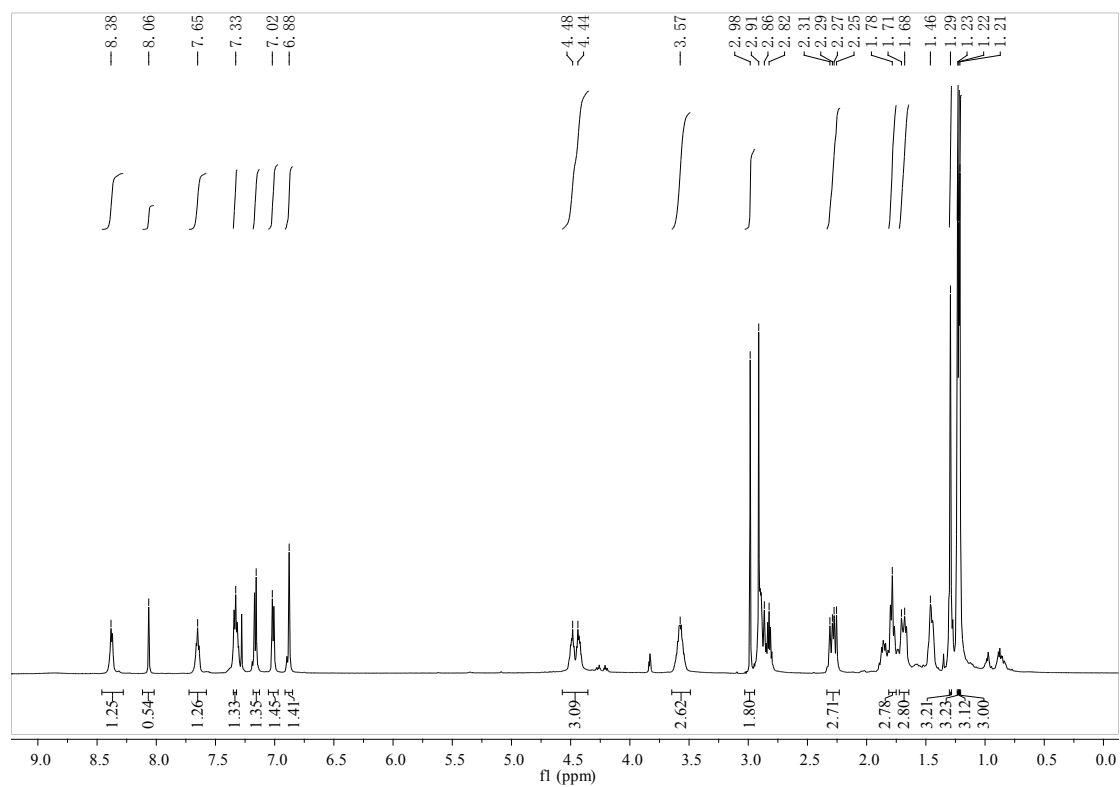

Figure S46.  $^1\text{H-NMR}$  spectrum of the target compound (**31**) in  $\text{CDCl}_3$

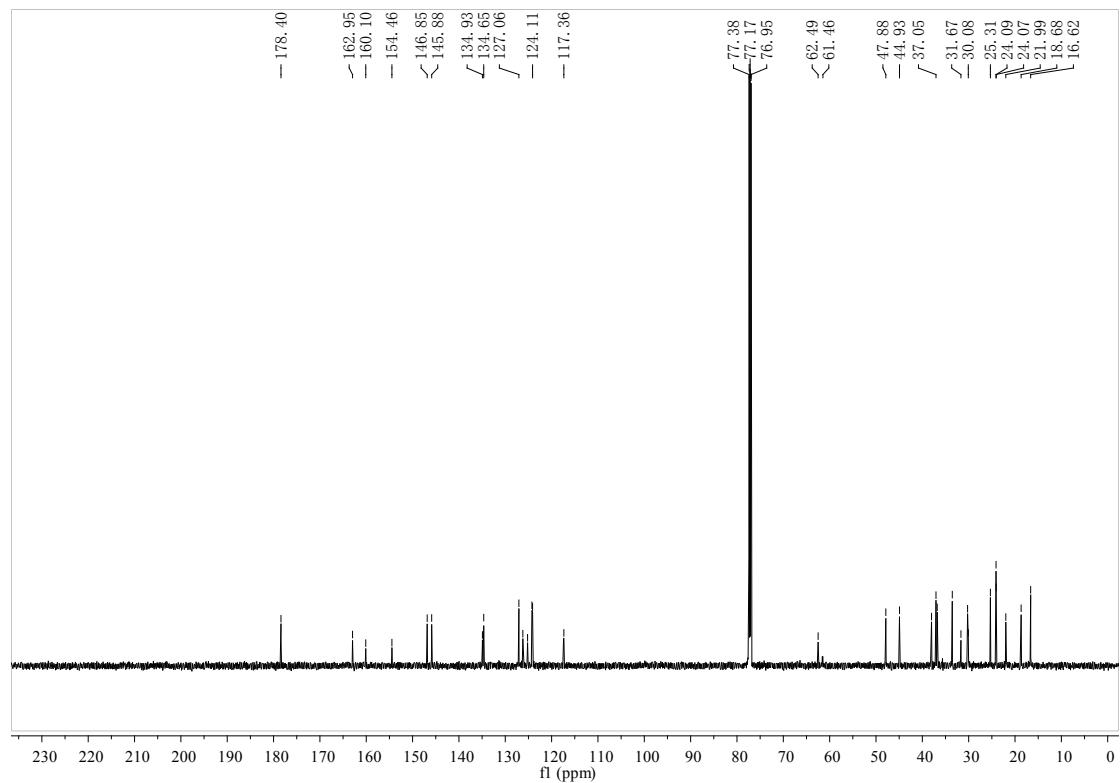

Figure S47.  $^{13}\text{C-NMR}$  spectrum of the target compound (**31**) in  $\text{CDCl}_3$



|                    |                           |                               |         |                        |                      |
|--------------------|---------------------------|-------------------------------|---------|------------------------|----------------------|
| <b>Sample Name</b> | LFY12                     | <b>Position</b>               | P1-B3   | <b>Instrument Name</b> | Instrument 1         |
| <b>User Name</b>   |                           | <b>Inj Vol</b>                | 0.05    | <b>InjPosition</b>     |                      |
| <b>Sample Type</b> | Sample                    | <b>IRM Calibration Status</b> | Success | <b>Data Filename</b>   | LFY12.d              |
| <b>ACQ Method</b>  | yijing10-95% 8min Zheng.m | <b>Comment</b>                |         | <b>Acquired Time</b>   | 4/20/2020 5:47:56 PM |

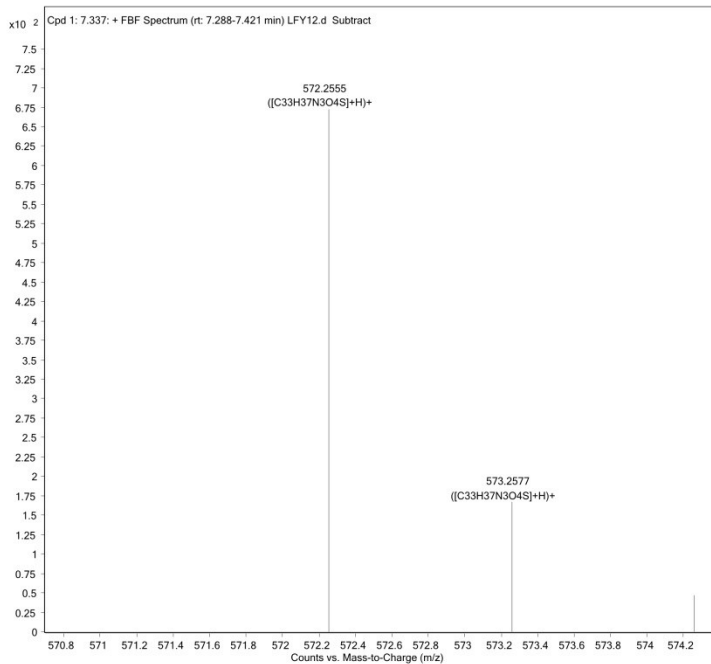

**Figure S48.** HR-MS spectrum of the target compound (**3I**)

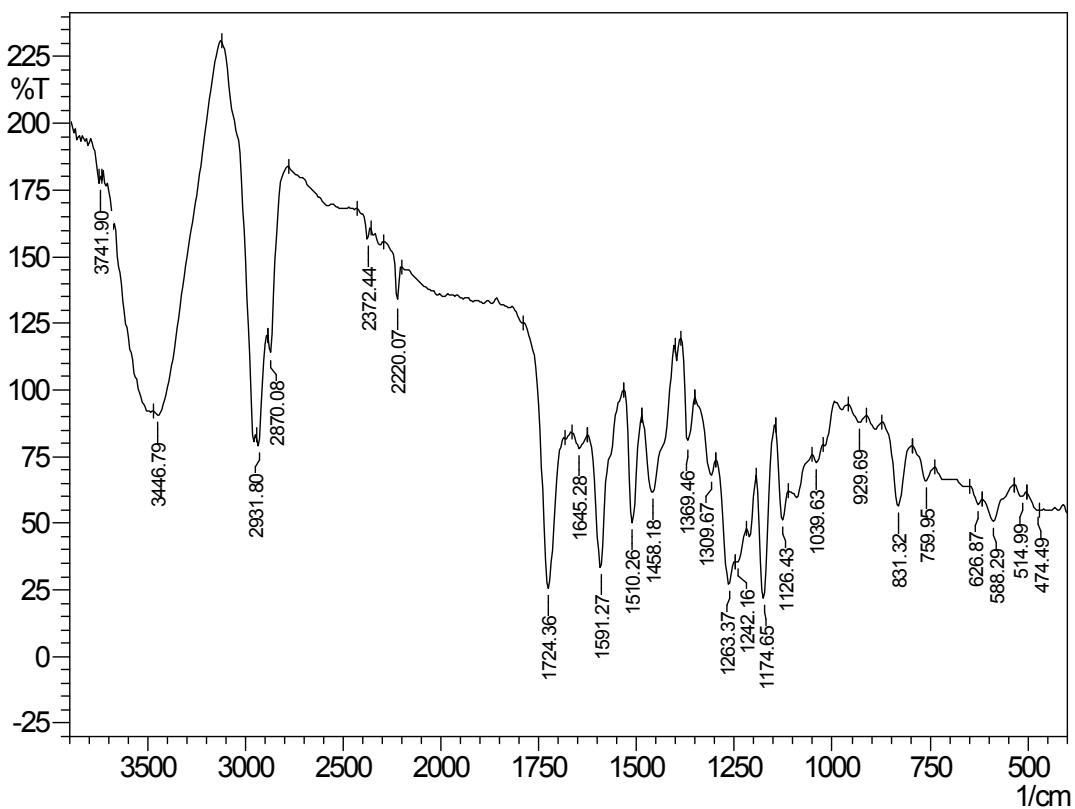

**Figure S49.** FTIR spectrum of the target compound (**3m**)

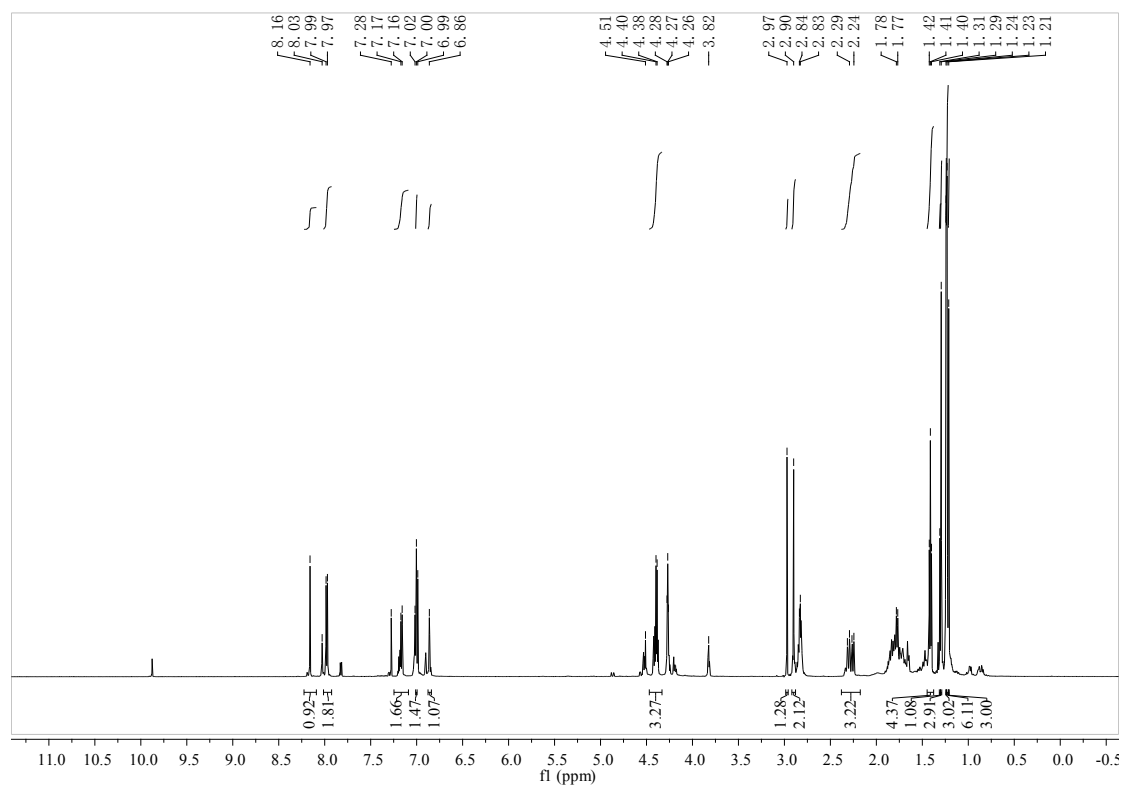

Figure S50.  $^1\text{H-NMR}$  spectrum of the target compound (**3m**) in  $\text{CDCl}_3$

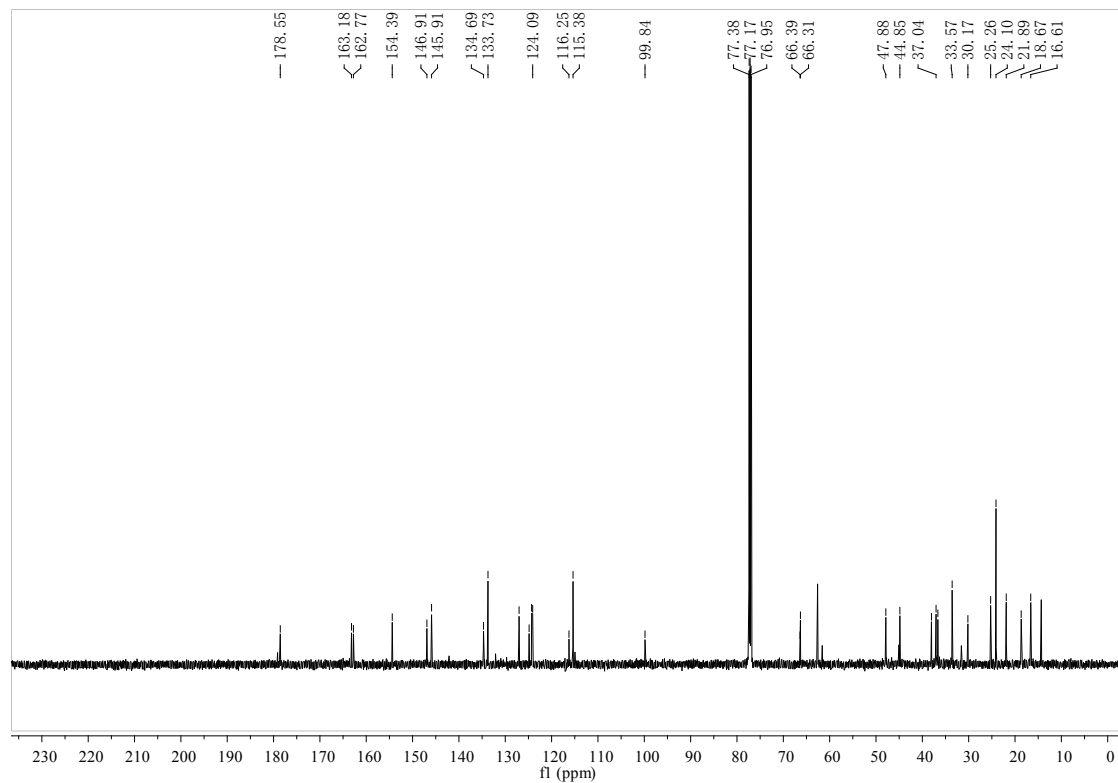

Figure S51.  $^{13}\text{C-NMR}$  spectrum of the target compound (**3m**) in  $\text{CDCl}_3$

|                    |                           |                               |         |                        |                      |
|--------------------|---------------------------|-------------------------------|---------|------------------------|----------------------|
| <b>Sample Name</b> | LFY16                     | <b>Position</b>               | P1-B7   | <b>Instrument Name</b> | Instrument 1         |
| <b>User Name</b>   |                           | <b>Inj Vol</b>                | 0.05    | <b>InjPosition</b>     |                      |
| <b>Sample Type</b> | Sample                    | <b>IRM Calibration Status</b> | Success | <b>Data Filename</b>   | LFY16.d              |
| <b>ACQ Method</b>  | yijing10-95% 8min Zheng.m | <b>Comment</b>                |         | <b>Acquired Time</b>   | 4/20/2020 6:46:49 PM |

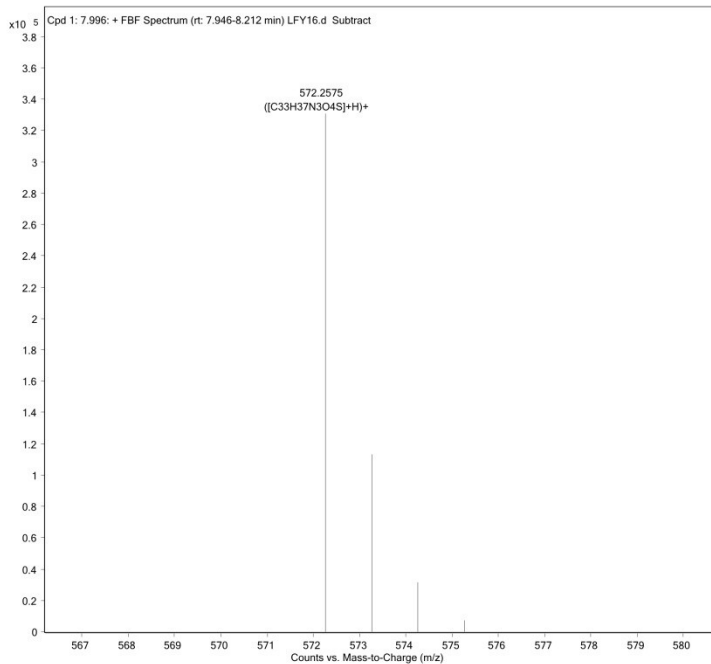

**Figure S52.** HR-MS spectrum of the target compound (**3m**)

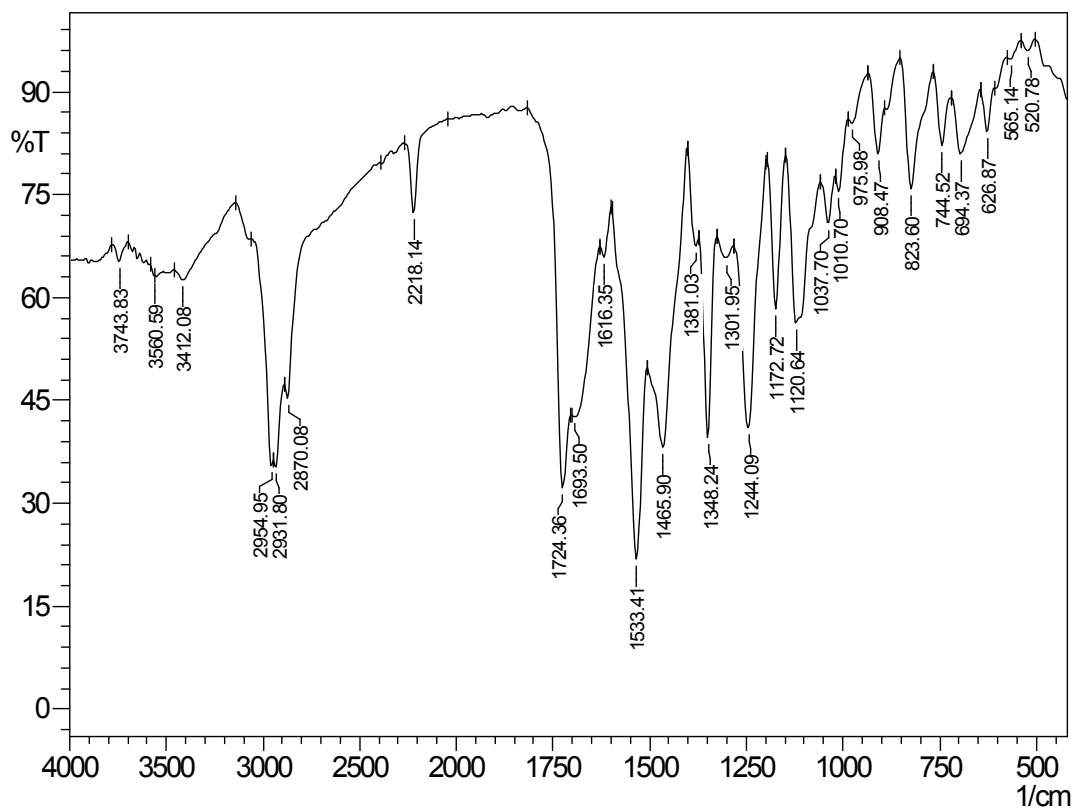

**Figure S53.** FTIR spectrum of the target compound (**3n**)

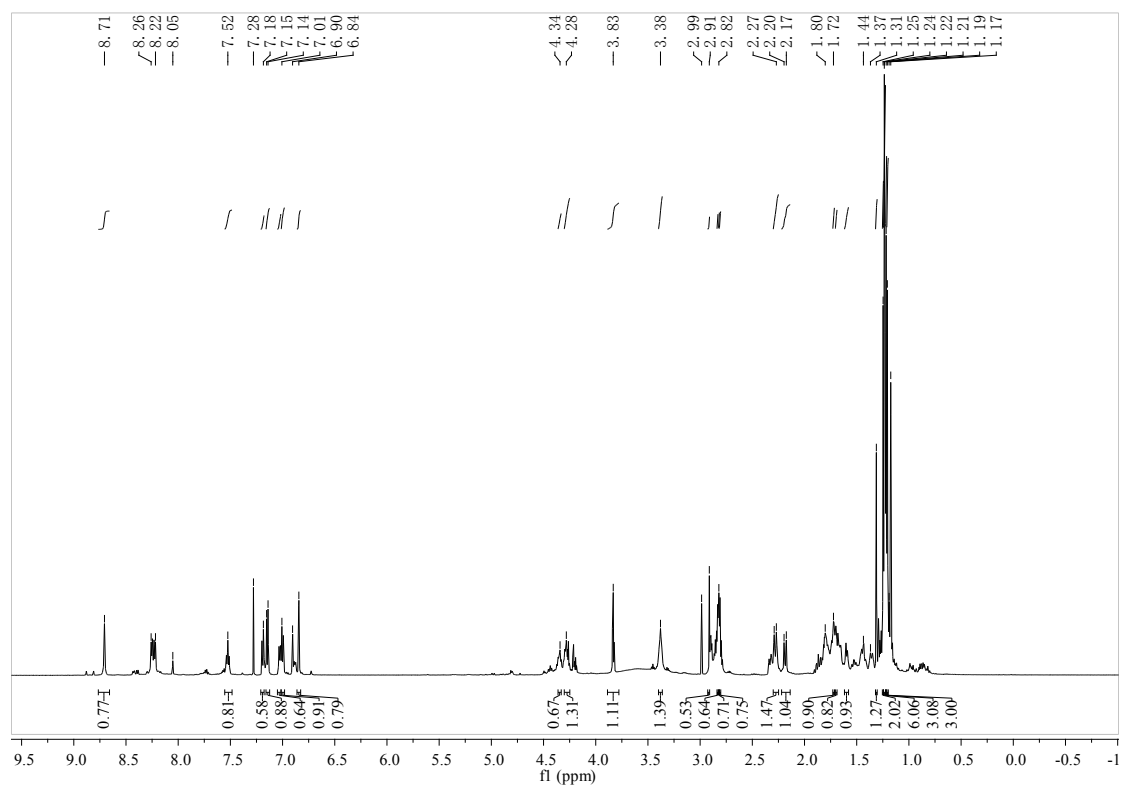

Figure S54.  $^1\text{H-NMR}$  spectrum of the target compound (**3n**) in  $\text{CDCl}_3$

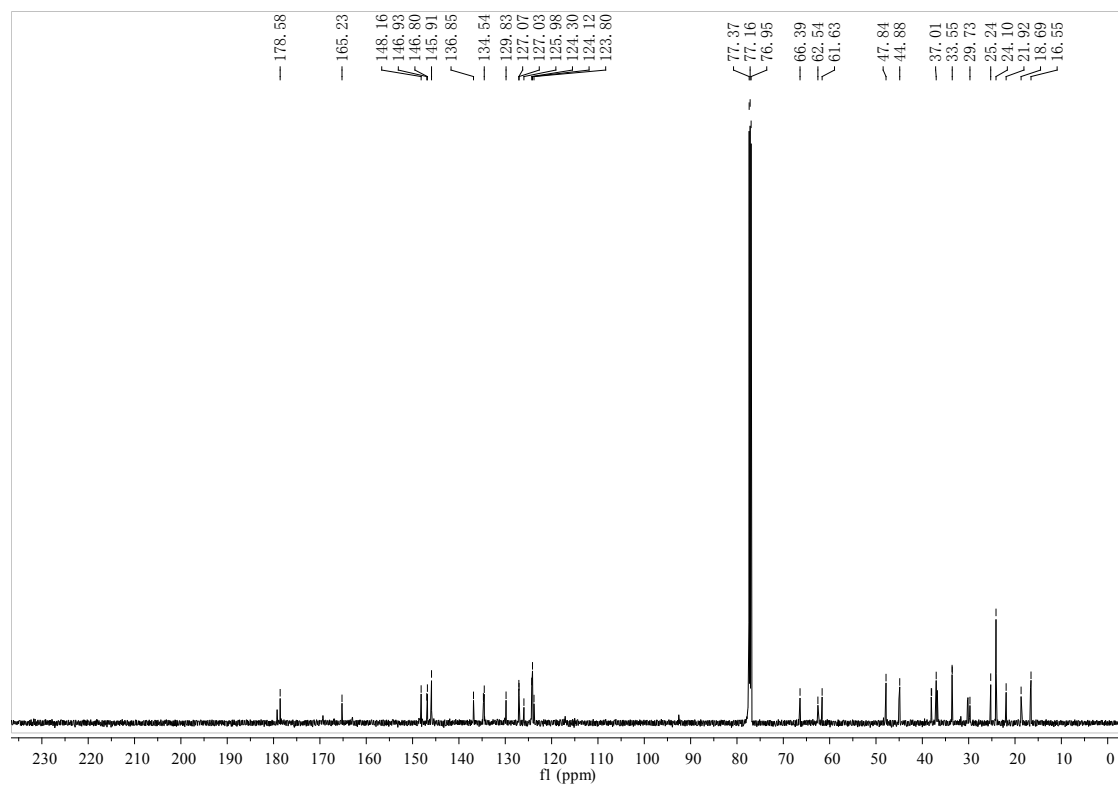

Figure S55.  $^{13}\text{C-NMR}$  spectrum of the target compound (**3n**) in  $\text{CDCl}_3$

|                    |                           |                               |         |                        |                      |
|--------------------|---------------------------|-------------------------------|---------|------------------------|----------------------|
| <b>Sample Name</b> | LFY14                     | <b>Position</b>               | P1-B5   | <b>Instrument Name</b> | Instrument 1         |
| <b>User Name</b>   |                           | <b>Inj Vol</b>                | 0.05    | <b>InjPosition</b>     |                      |
| <b>Sample Type</b> | Sample                    | <b>IRM Calibration Status</b> | Success | <b>Data Filename</b>   | LFY14.d              |
| <b>ACQ Method</b>  | yijing10-95% 8min Zheng.m | <b>Comment</b>                |         | <b>Acquired Time</b>   | 4/20/2020 6:17:23 PM |

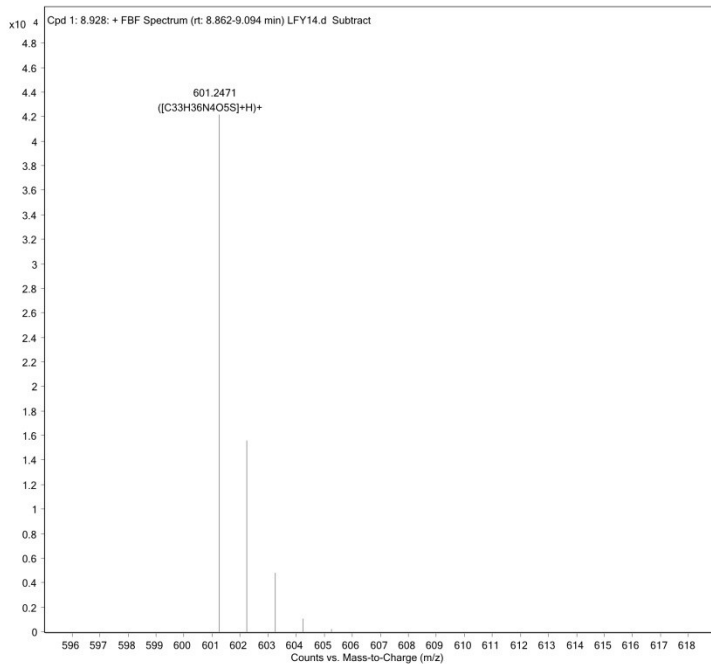

**Figure S56.** HR-MS spectrum of the target compound (**3n**)

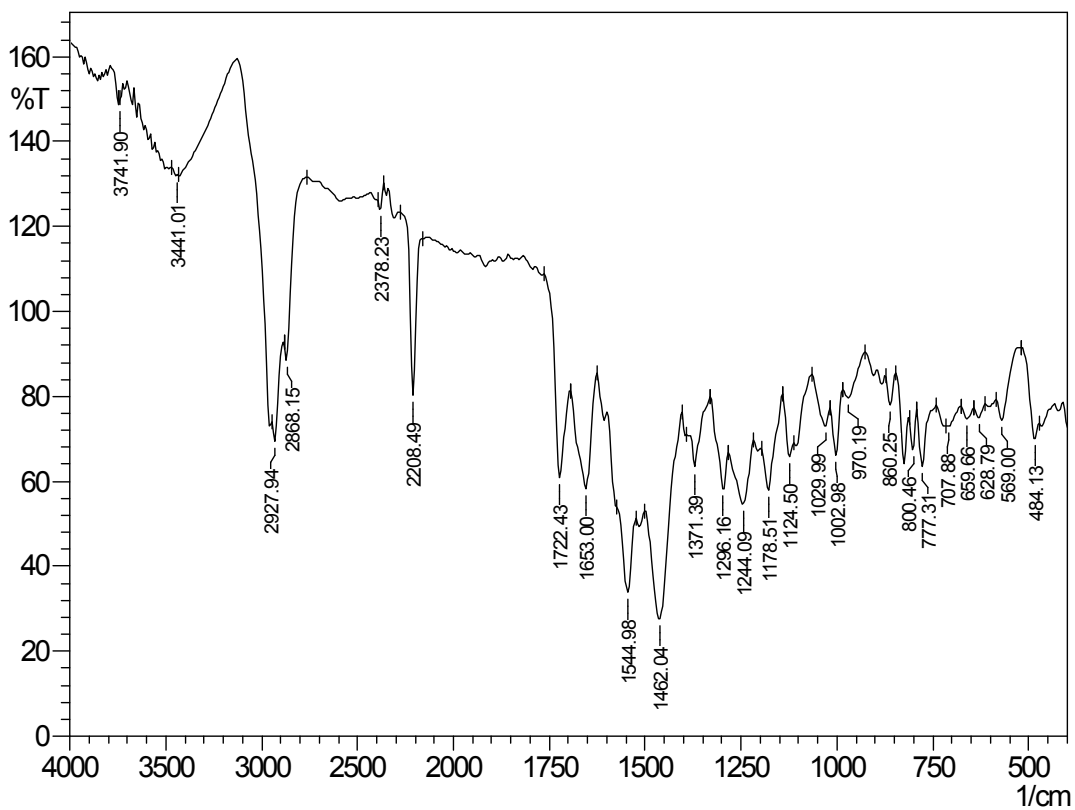

Figure S57. FTIR spectrum of the target compound (**3o**)

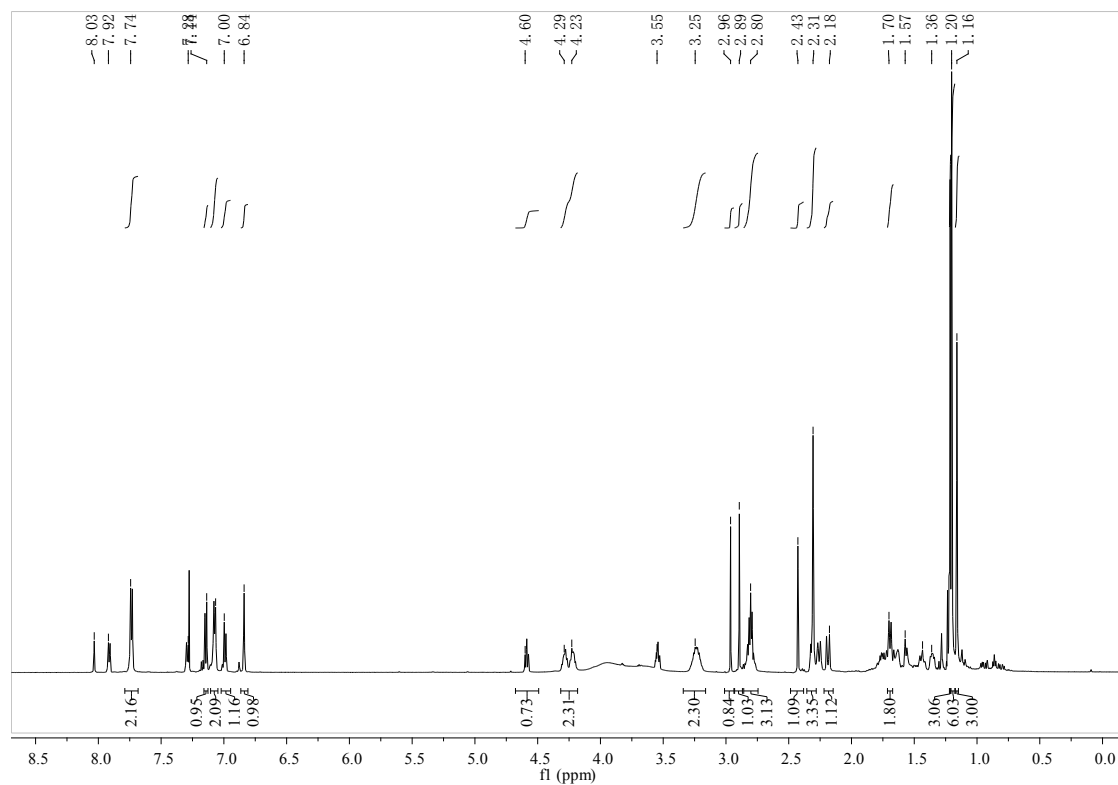

Figure S58. <sup>1</sup>H-NMR spectrum of the target compound (**3o**) in CDCl<sub>3</sub>

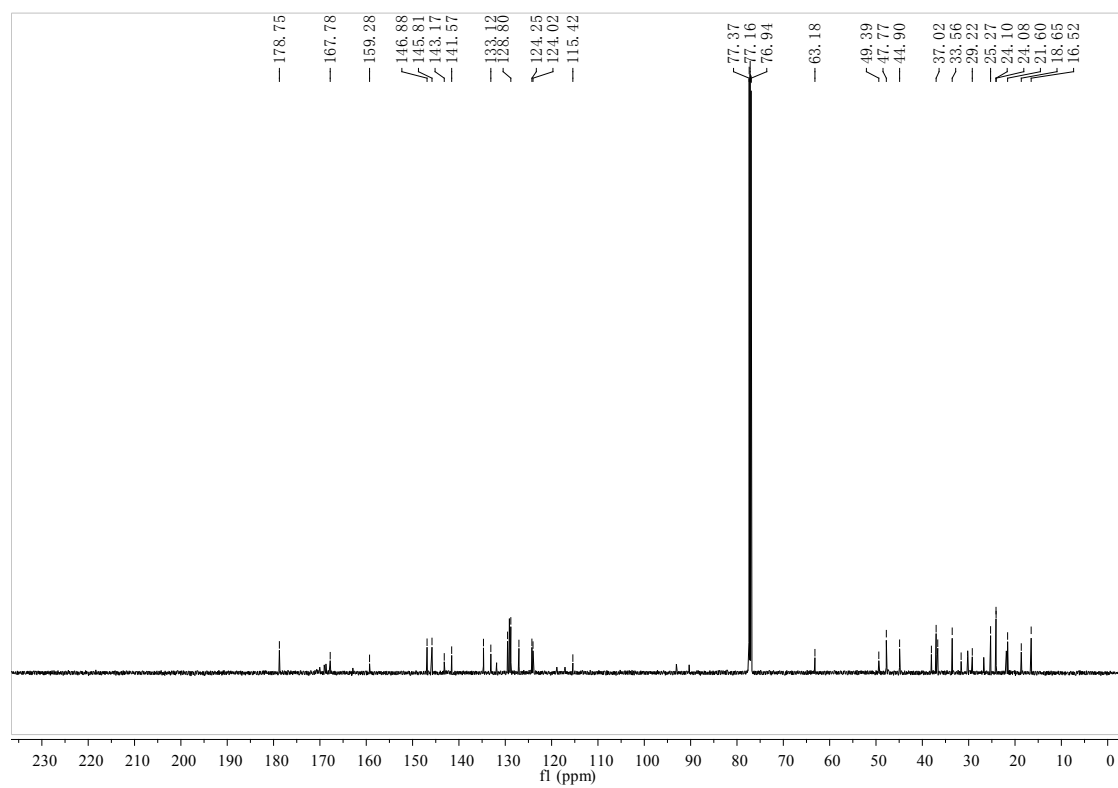

Figure S59. <sup>13</sup>C-NMR spectrum of the target compound (**3o**) in CDCl<sub>3</sub>

|                    |                           |                               |         |                        |                      |
|--------------------|---------------------------|-------------------------------|---------|------------------------|----------------------|
| <b>Sample Name</b> | LFY15                     | <b>Position</b>               | P1-B6   | <b>Instrument Name</b> | Instrument 1         |
| <b>User Name</b>   |                           | <b>Inj Vol</b>                | 0.05    | <b>InjPosition</b>     |                      |
| <b>Sample Type</b> | Sample                    | <b>IRM Calibration Status</b> | Success | <b>Data Filename</b>   | LFY15.d              |
| <b>ACQ Method</b>  | yijing10-95% 8min Zheng.m | <b>Comment</b>                |         | <b>Acquired Time</b>   | 4/20/2020 6:32:07 PM |

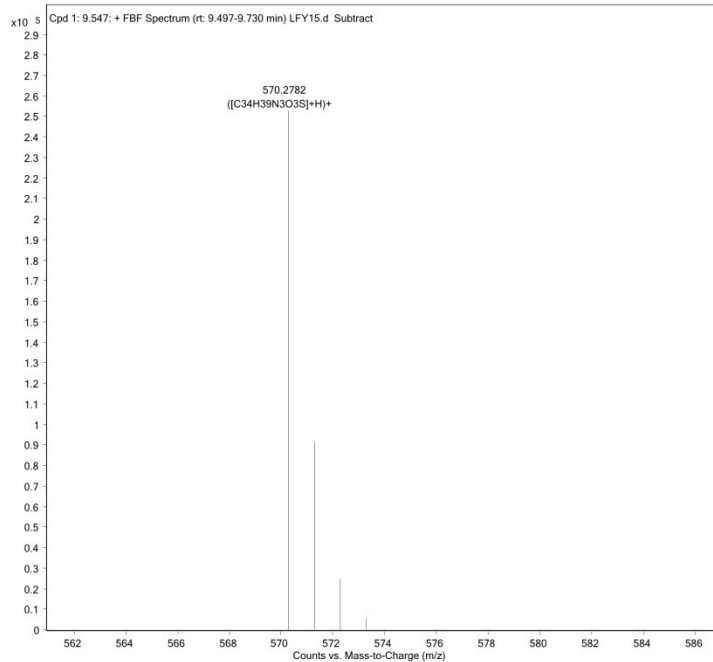

**Figure S60.** HR-MS spectrum of the target compound (**30**)
